# Supplementary material for: Changes in whistle parameters of two common bottlenose dolphin ecotypes as a result of the physical presence of the research vessel
Source: PeerJ. 2022 Oct 7;10:e14074. doi: 10.7717/peerj.14074 (PMC9549881; doi:10.7717/peerj.14074)
Supplement: Supplemental Information 1 [file peerj-10-14074-s001.xlsx]

## Sheet: Full dataset
Date (dd/mm/yyyy)	Sighting N°	Recording	Ecotype	Duration (min)	Whistles
2020-10-30	1	1	Coastal	6	2
2020-10-30	1	2	Coastal	10	5
2020-10-30	1	3	Coastal	10	10
2020-10-30	1	4	Coastal	10	0
2020-10-30	1	5	Coastal	10	0
2020-10-30	2	6	Coastal	1.7	1
2020-10-30	2	7	Coastal	5	1
2020-10-30	3	8	Coastal	5.8	2
2020-10-30	3	9	Coastal	10	1
2020-10-30	3	10	Coastal	5.5	0
2020-10-30	4	11	Coastal	5	0
2020-11-12	5	12	Oceanic	6	0
2020-11-12	5	13	Oceanic	10	2
2020-11-12	5	14	Oceanic	7	0
2020-11-12	5	15	Oceanic	5	0
2020-11-18	6	16	Coastal	5	0
2020-11-18	6	17	Coastal	5	0
2020-11-18	6	18	Coastal	5	0
2020-11-18	7	19	Coastal	5	0
2020-11-18	7	20	Coastal	10	0
2020-11-18	7	21	Coastal	10	0
2020-11-18	8	22	Coastal	5	8
2020-11-18	8	23	Coastal	5	0
2020-11-18	8	24	Coastal	5	0
2020-12-07	9	25	Coastal	6	0
2020-12-07	9	26	Coastal	10	6
2020-12-07	9	27	Coastal	5	1
2020-12-07	9	28	Coastal	5	1
2020-12-07	9	29	Coastal	10	0
29/03/2021	10	30	Coastal	0.5	0
29/03/2021	11	31	Coastal	7	3
2021-04-16	12	32	Oceanic	10	0
2021-04-16	12	33	Oceanic	10	0
2021-04-16	12	34	Oceanic	6.5	0
2021-04-16	12	35	Oceanic	10	0
2021-04-16	13	36	Oceanic	10	0
2021-04-16	14	37	Oceanic	10	0
2021-04-16	15	38	Oceanic	4.8	0
2021-04-16	15	39	Oceanic	7	0
2021-04-25	16	40	Coastal	10	0
2021-04-25	16	41	Coastal	10	3
2021-04-25	17	42	Coastal	10	0
2021-04-25	17	43	Coastal	10	2
2021-05-06	18	44	Oceanic	1.9	3
2021-05-06	18	45	Oceanic	15	24
2021-05-06	18	46	Oceanic	5	14
2021-05-06	18	47	Oceanic	3.5	9
2021-05-06	18	48	Oceanic	6	9
2021-05-06	18	49	Oceanic	10	18
2021-05-06	18	50	Oceanic	6.5	7
2021-05-06	18	51	Oceanic	15	42
2021-05-06	18	52	Oceanic	10	19
2021-05-06	19	53	Oceanic	15	6
2021-05-06	19	54	Oceanic	15	17
2021-05-06	19	55	Oceanic	15	18
14/05/2021	20	56	Coastal	10	20
14/05/2021	20	57	Coastal	10	21
14/05/2021	20	58	Coastal	4.9	0
14/05/2021	20	59	Coastal	5.8	11
14/05/2021	20	60	Coastal	15	2
14/05/2021	20	61	Coastal	2.5	5
14/05/2021	20	62	Coastal	2	0
14/05/2021	20	63	Coastal	10	12
16/05/2021	21	64	Oceanic	5	0
16/05/2021	21	65	Oceanic	15	28
16/05/2021	21	66	Oceanic	16	23
16/05/2021	21	67	Oceanic	15	23
16/05/2021	22	68	Coastal	1	4
16/05/2021	22	69	Coastal	4.6	18
16/05/2021	22	70	Coastal	10	30
16/05/2021	22	71	Coastal	6.5	12
16/05/2021	22	72	Coastal	10	16
16/05/2021	22	73	Coastal	20	37
16/05/2021	22	74	Coastal	9.2	32
2021-05-29	23	75	Coastal	5	19
2021-05-29	23	76	Coastal	4.9	26
2021-05-29	23	77	Coastal	6.5	0
2021-05-29	23	78	Coastal	15	13
2021-05-29	23	79	Coastal	10	8
2021-05-29	24	80	Coastal	10	4
2021-06-07	25	81	Coastal	6.3	2
2021-06-07	25	82	Coastal	5	3
2021-06-07	25	83	Coastal	10	10
2021-06-07	25	84	Coastal	7.8	2
2021-06-07	26	85	Coastal	10	25
2021-06-07	26	86	Coastal	10	5
2021-06-07	26	87	Coastal	10	14
2021-06-07	26	88	Coastal	10	0
2021-06-07	27	89	Coastal	10	0
2021-06-07	28	90	Coastal	5	1
2021-06-07	28	91	Coastal	5.3	0
2021-06-07	28	92	Coastal	7	4
2021-06-07	28	93	Coastal	10	2
2021-06-07	28	94	Coastal	10	14
2021-06-07	28	95	Coastal	15	38
11/06/2021	29	96	Oceanic	10	0
11/06/2021	30	97	Coastal	10	9
11/06/2021	30	98	Coastal	7.2	4
22/06/2021	31	99	Coastal	11	6
22/06/2021	31	100	Coastal	5	0
22/06/2021	31	101	Coastal	5.3	0
2021-07-25	32	102	Oceanic	10	26
2021-07-25	32	103	Oceanic	10	7
2021-07-25	32	104	Oceanic	10	16
2021-07-25	32	105	Oceanic	15	49
2021-07-25	32	106	Oceanic	15	48
02/08/2021	33	107	Oceanic	10	1
02/08/2021	33	108	Oceanic	10	5
02/08/2021	33	109	Oceanic	10	8
02/08/2021	33	110	Oceanic	10	37
02/08/2021	33	111	Oceanic	10	13
02/08/2021	33	112	Oceanic	10	50
02/08/2021	33	113	Oceanic	10	11
2021-08-24	34	114	Coastal	3.7	0
2021-08-24	34	115	Coastal	10	0
2021-08-24	34	116	Coastal	10	22
2021-08-24	34	117	Coastal	10	6
2021-08-24	35	118	Coastal	6	0
2021-08-24	35	119	Coastal	2	0
2021-08-24	36	120	Coastal	10	5
2021-08-24	36	121	Coastal	4	35
2021-08-24	37	122	Coastal	10	43
2021-08-24	37	123	Coastal	5	39
2021-08-24	37	124	Coastal	10	34
2021-08-24	37	125	Coastal	10	5
07/09/2021	38	126	Coastal	7	1
07/09/2021	38	127	Coastal	10	10
07/09/2021	39	128	Oceanic	5	0
07/09/2021	39	129	Oceanic	5	0
07/09/2021	40	130	Oceanic	2.5	0
07/09/2021	40	131	Oceanic	5	0
