# Supplementary material for: Changes in whistle parameters of two common bottlenose dolphin ecotypes as a result of the physical presence of the research vessel
Source: PeerJ. 2022 Oct 7;10:e14074. doi: 10.7717/peerj.14074 (PMC9549881; doi:10.7717/peerj.14074)
Supplement: Supplemental Information 2 [file peerj-10-14074-s002.xlsx]

## Sheet: Comparison parameters
Date (dd/mm/yyyy)	Sighting	Time interval	Ecotype	Group name	Duration (s)	Maximum frequency (kHz)	Minimum frequency (kHz)	Frequency range (kHz)	Starting frequency (kHz)	Ending frequency (kHz)	Peak frequency (kHz)	Group size
2020-10-30	1	First time interval (n = 62)	Coastal	Coastal 30.10.2021 sig.1	0.901446	17.4691	9.70906	7.76001	17.4691	14.6038	10.4297	10
2020-10-30	1	First time interval (n = 62)	Coastal	Coastal 30.10.2021 sig.1	0.512064	14.1396	7.49785	6.64173	7.49785	9.68059	10.7109	10
2020-10-30	1	Second time interval (n = 62)	Coastal	Coastal 30.10.2021 sig.1	1.00813	14.3909	7.99828	6.39266	8.35851	7.99828	9.53906	10
2020-10-30	1	Second time interval (n = 62)	Coastal	Coastal 30.10.2021 sig.1	1.0508	16.5696	8.1166	8.45298	16.5696	8.18843	8.32031	10
2020-10-30	3	Second time interval (n = 62)	Coastal	Coastal 30.10.2021 sig.3	0.698754	13.451	4.72813	8.72285	13.451	9.37285	8.13281	10
2021-04-25	7	First time interval (n = 62)	Coastal	Coastal 25.04.2021 sig.7	0.650748	13.2549	10.2662	2.98866	10.2964	10.9193	11.4375	25
2021-04-25	7	Second time interval (n = 62)	Coastal	Coastal 25.04.2021 sig.7	0.218694	14.7764	11.6824	3.09401	13.7304	11.6824	12.9375	25
2021-05-06	2	First time interval (n = 98)	Oceanic	Oceanic 06.05.2021 sig.2	0.938784	14.995	5.99793	8.99705	5.99793	9.85269	7.57031	30
2021-05-06	2	First time interval (n = 98)	Oceanic	Oceanic 06.05.2021 sig.2	1.0668	14.4333	5.9105	8.52277	5.9105	8.63294	9.63281	30
2021-05-14	1	First time interval (n = 62)	Coastal	Coastal 14.05.2021 sig.1	0.282702	12.6837	6.43595	6.24771	12.6837	6.43595	7.42969	50
2021-05-14	1	First time interval (n = 62)	Coastal	Coastal 14.05.2021 sig.1	1.53619	19.1342	9.0749	10.0593	15.9958	14.4757	16.2656	50
2021-05-14	1	First time interval (n = 62)	Coastal	Coastal 14.05.2021 sig.1	0.496062	15.4419	10.6033	4.83859	10.6033	15.4419	10.875	50
2021-05-14	1	First time interval (n = 62)	Coastal	Coastal 14.05.2021 sig.1	1.18948	17.6237	8.99529	8.62838	8.99529	11.6824	10.4766	50
2021-05-14	1	First time interval (n = 62)	Coastal	Coastal 14.05.2021 sig.1	0.757428	13.216	7.30226	5.91377	7.30226	13.216	8.71875	50
2021-05-14	1	First time interval (n = 62)	Coastal	Coastal 14.05.2021 sig.1	0.368046	15.5329	8.60763	6.92523	8.60763	11.7167	10.3828	50
2021-05-14	1	First time interval (n = 62)	Coastal	Coastal 14.05.2021 sig.1	0.816102	18.3634	4.30402	14.0594	4.30402	14.6899	9.72656	50
2021-05-14	1	First time interval (n = 62)	Coastal	Coastal 14.05.2021 sig.1	0.496062	15.3515	6.43595	8.91551	6.43595	9.31796	9.96094	50
2021-05-14	1	First time interval (n = 62)	Coastal	Coastal 14.05.2021 sig.1	0.170688	16.2324	14.9072	1.32526	15.0833	16.2324	16.2422	50
2021-05-14	1	First time interval (n = 62)	Coastal	Coastal 14.05.2021 sig.1	0.261366	13.4115	6.2865	7.12503	6.2865	12.066	13.5	50
2021-05-14	1	First time interval (n = 62)	Coastal	Coastal 14.05.2021 sig.1	1.40818	16.0428	9.82379	6.21906	13.57	15.3966	11.8594	50
2021-05-14	1	First time interval (n = 62)	Coastal	Coastal 14.05.2021 sig.1	1.71755	18.4716	10.4181	8.05347	10.4181	11.614	11.2734	50
2021-05-14	1	First time interval (n = 62)	Coastal	Coastal 14.05.2021 sig.1	0.874776	16.8147	5.67241	11.1423	11.0809	5.67241	9.96094	50
2021-05-14	1	First time interval (n = 62)	Coastal	Coastal 14.05.2021 sig.1	1.40818	12.2085	5.39616	6.81237	6.43595	5.39616	7.75781	50
2021-05-14	1	First time interval (n = 62)	Coastal	Coastal 14.05.2021 sig.1	0.464058	15.0391	7.45394	7.58514	7.45394	8.38309	8.67188	50
2021-05-14	1	First time interval (n = 62)	Coastal	Coastal 14.05.2021 sig.1	1.68021	12.3528	5.77325	6.57955	5.82434	5.80726	8.20312	50
2021-05-14	1	First time interval (n = 62)	Coastal	Coastal 14.05.2021 sig.1	1.33883	12.3891	5.1033	7.28583	5.1033	5.39616	9.09375	50
2021-05-14	1	First time interval (n = 62)	Coastal	Coastal 14.05.2021 sig.1	0.37338	20.8352	8.26089	12.5743	8.96891	8.26089	9.5625	50
2021-05-14	1	First time interval (n = 62)	Coastal	Coastal 14.05.2021 sig.1	0.437388	18.4716	6.98756	11.484	7.47586	6.98756	9.35156	50
2021-05-14	1	First time interval (n = 62)	Coastal	Coastal 14.05.2021 sig.1	1.18948	18.7448	6.41707	12.3277	6.41707	7.07013	9.21094	50
2021-05-14	1	First time interval (n = 62)	Coastal	Coastal 14.05.2021 sig.1	1.51486	12.137	5.85865	6.27838	6.14052	5.87588	10.1016	50
2021-05-14	1	First time interval (n = 62)	Coastal	Coastal 14.05.2021 sig.1	0.40005	15.9489	7.78964	8.15925	9.79498	7.78964	16.125	50
2021-05-14	1	First time interval (n = 62)	Coastal	Coastal 14.05.2021 sig.1	0.410718	16.9137	7.88169	9.03205	7.88169	8.78641	12.9375	50
2021-05-14	1	First time interval (n = 62)	Coastal	Coastal 14.05.2021 sig.1	1.3655	12.3528	5.33314	7.01966	7.65358	5.33314	8.17969	50
2021-05-14	1	First time interval (n = 62)	Coastal	Coastal 14.05.2021 sig.1	1.93091	16.2802	7.5642	8.71597	10.4487	10.3571	12.8672	50
2021-05-14	1	First time interval (n = 62)	Coastal	Coastal 14.05.2021 sig.1	2.01625	19.9373	4.88336	15.0539	4.88336	7.00811	9.82031	50
2021-05-14	1	First time interval (n = 62)	Coastal	Coastal 14.05.2021 sig.1	1.55219	20.0547	7.92812	12.1266	17.9897	9.10159	8.88281	50
2021-05-14	1	Second time interval (n = 62)	Coastal	Coastal 14.05.2021 sig.1	1.38684	16.0428	6.45488	9.58797	6.45488	9.82379	9.39844	50
2021-05-14	1	Second time interval (n = 62)	Coastal	Coastal 14.05.2021 sig.1	1.22149	14.6468	4.15498	10.4918	4.15498	7.92812	11.6953	50
2021-05-14	1	Second time interval (n = 62)	Coastal	Coastal 14.05.2021 sig.1	1.01879	7.38855	5.82434	1.56421	5.85865	7.36688	6.16406	50
2021-05-14	1	Second time interval (n = 62)	Coastal	Coastal 14.05.2021 sig.1	1.04546	14.2647	8.96891	5.2958	14.2647	10.4795	9.35156	50
2021-05-14	1	Second time interval (n = 62)	Coastal	Coastal 14.05.2021 sig.1	0.341376	18.9663	6.05101	12.9153	13.6499	6.05101	6.07031	50
2021-05-14	1	Second time interval (n = 62)	Coastal	Coastal 14.05.2021 sig.1	0.378714	20.1729	6.8253	13.3476	10.9514	6.96707	7.21875	50
2021-05-14	1	Second time interval (n = 62)	Coastal	Coastal 14.05.2021 sig.1	2.37363	11.2448	6.64726	4.59751	7.02872	11.2448	7.61719	50
2021-05-14	1	Second time interval (n = 62)	Coastal	Coastal 14.05.2021 sig.1	2.1016	19.7044	8.1166	11.5878	10.1463	11.925	9.84375	50
2021-05-14	1	Second time interval (n = 62)	Coastal	Coastal 14.05.2021 sig.1	0.362712	12.3891	7.19582	5.19331	12.3891	7.19582	9.53906	50
2021-05-14	1	Second time interval (n = 62)	Coastal	Coastal 14.05.2021 sig.1	1.18948	22.8882	6.2865	16.6017	20.6524	6.2865	17.7422	50
2021-05-14	1	Second time interval (n = 62)	Coastal	Coastal 14.05.2021 sig.1	0.34671	15.2168	7.72131	7.49548	8.53212	7.72131	7.82812	50
2021-05-14	1	Second time interval (n = 62)	Coastal	Coastal 14.05.2021 sig.1	0.858774	13.7304	7.67609	6.05427	8.48215	8.23667	10.5703	50
2021-05-14	1	Second time interval (n = 62)	Coastal	Coastal 14.05.2021 sig.1	0.34671	15.6703	7.67609	7.99422	12.9091	7.67609	8.53125	50
2021-05-16	1	First time interval (n = 98)	Oceanic	Oceanic 16.05.2021 sig.1	2.09093	14.5183	5.50824	9.01006	6.23135	7.74402	8.88281	50
2021-05-16	1	First time interval (n = 98)	Oceanic	Oceanic 16.05.2021 sig.1	1.14681	16.328	5.08833	11.2397	9.6239	5.08833	10.5703	50
2021-05-16	1	First time interval (n = 98)	Oceanic	Oceanic 16.05.2021 sig.1	0.954786	18.6898	8.02181	10.668	8.02181	18.0426	10.8281	50
2021-05-16	1	First time interval (n = 98)	Oceanic	Oceanic 16.05.2021 sig.1	0.624078	15.7164	5.87588	9.84052	5.87588	7.97483	13.7344	50
2021-05-16	1	First time interval (n = 98)	Oceanic	Oceanic 16.05.2021 sig.1	0.618744	15.8555	8.02181	7.83368	9.5115	8.02181	12.0469	50
2021-05-16	1	First time interval (n = 98)	Oceanic	Oceanic 16.05.2021 sig.1	3.52044	33.4308	5.65578	27.7751	24.2729	5.67241	15.2109	50
2021-05-16	1	First time interval (n = 98)	Oceanic	Oceanic 16.05.2021 sig.1	0.752094	11.5459	7.67609	3.86985	8.0928	7.67609	10.1953	50
2021-05-16	1	Second time interval (n = 44)	Oceanic	Oceanic 16.05.2021 sig.1	0.917448	17.7275	6.92627	10.8012	6.92627	8.45728	16.0078	50
2021-05-16	1	Second time interval (n = 44)	Oceanic	Oceanic 16.05.2021 sig.1	0.954786	25.5155	7.36688	18.1486	25.4407	7.36688	7.28906	50
2021-05-16	1	Second time interval (n = 44)	Oceanic	Oceanic 16.05.2021 sig.1	0.77343	19.7044	7.38855	12.3159	7.38855	7.81256	12.5391	50
2021-06-07	2	First time interval (n = 62)	Coastal	Coastal 07.06.2021 sig.2	0.517398	13.333	7.17472	6.15827	12.4621	7.21698	7.61719	20
2021-06-07	2	First time interval (n = 62)	Coastal	Coastal 07.06.2021 sig.2	1.28016	16.0428	6.58895	9.4539	7.78964	7.97483	7.05469	20
2021-06-07	2	First time interval (n = 62)	Coastal	Coastal 07.06.2021 sig.2	0.602742	13.451	6.56963	6.88135	9.53948	8.5071	10.875	20
2021-06-07	2	First time interval (n = 62)	Coastal	Coastal 07.06.2021 sig.2	0.714756	15.1277	6.14052	8.98716	6.24968	9.70906	14.9297	20
2021-06-07	2	First time interval (n = 62)	Coastal	Coastal 07.06.2021 sig.2	1.62154	12.2444	5.05853	7.18591	6.03326	5.05853	8.76562	20
2021-06-07	2	First time interval (n = 62)	Coastal	Coastal 07.06.2021 sig.2	0.570738	13.2549	5.89317	7.36173	9.31796	5.89317	8.20312	20
2021-06-07	2	First time interval (n = 62)	Coastal	Coastal 07.06.2021 sig.2	0.501396	13.2549	6.08666	7.16824	12.7959	6.08666	8.29688	20
2021-06-07	2	First time interval (n = 62)	Coastal	Coastal 07.06.2021 sig.2	0.704088	15.3515	7.95144	7.40001	7.95144	11.5121	11.5312	20
2021-06-07	2	First time interval (n = 62)	Coastal	Coastal 07.06.2021 sig.2	1.79222	13.6901	7.19582	6.49428	11.9601	9.42807	7.6875	20
2021-06-07	2	First time interval (n = 62)	Coastal	Coastal 07.06.2021 sig.2	0.394716	17.7275	15.9489	1.7786	16.2324	15.9489	17.6484	20
2021-06-07	2	First time interval (n = 62)	Coastal	Coastal 07.06.2021 sig.2	0.565404	12.7584	7.11178	5.6466	7.11178	8.1166	10.1719	20
2021-06-07	2	First time interval (n = 62)	Coastal	Coastal 07.06.2021 sig.2	4.48056	18.0426	6.74559	11.297	9.6522	6.84538	9.5625	20
2021-06-07	5	First time interval (n = 62)	Coastal	Coastal 07.06.2021 sig.5	1.70155	15.2168	6.74559	8.4712	9.5115	14.8199	7.28906	20
2021-06-07	5	First time interval (n = 62)	Coastal	Coastal 07.06.2021 sig.5	0.677418	5.36456	4.09441	1.27015	5.36456	4.10645	4.875	20
2021-06-07	5	First time interval (n = 62)	Coastal	Coastal 07.06.2021 sig.5	0.714756	12.9852	4.91213	8.07305	12.9852	8.14047	9.75	20
2021-06-07	5	First time interval (n = 62)	Coastal	Coastal 07.06.2021 sig.5	0.704088	14.0156	5.1033	8.91225	14.0156	7.69867	7.14844	20
2021-06-07	5	First time interval (n = 62)	Coastal	Coastal 07.06.2021 sig.5	1.24282	10.7918	5.27086	5.52095	5.28636	10.2964	9.02344	20
2021-06-07	5	First time interval (n = 62)	Coastal	Coastal 07.06.2021 sig.5	0.757428	15.6703	8.38309	7.28723	15.2615	10.3875	8.53125	20
2021-06-07	5	First time interval (n = 62)	Coastal	Coastal 07.06.2021 sig.5	1.15748	15.2168	6.80529	8.41151	11.1461	14.2647	7.73438	20
2021-06-07	5	First time interval (n = 62)	Coastal	Coastal 07.06.2021 sig.5	1.23215	14.7764	4.26626	10.5101	4.26626	10.1166	6.79688	20
2021-06-07	5	First time interval (n = 62)	Coastal	Coastal 07.06.2021 sig.5	0.576072	8.48215	4.22884	4.25331	4.22884	8.48215	6.9375	20
2021-06-07	5	First time interval (n = 62)	Coastal	Coastal 07.06.2021 sig.5	1.57353	15.0391	6.23135	8.80773	13.8519	8.89024	8.27344	20
2021-06-07	5	First time interval (n = 62)	Coastal	Coastal 07.06.2021 sig.5	1.18948	14.951	4.30402	10.647	4.30402	14.1396	7.10156	20
2021-06-07	5	First time interval (n = 62)	Coastal	Coastal 07.06.2021 sig.5	0.8001	14.0981	7.17472	6.9234	11.7167	13.8519	7.73438	20
2021-06-07	5	First time interval (n = 62)	Coastal	Coastal 07.06.2021 sig.5	0.602742	15.8555	6.14052	9.71497	8.83817	6.14052	8.64844	20
2021-06-07	2	Second time interval (n = 62)	Coastal	Coastal 07.06.2021 sig.2	1.6322	12.137	5.57333	6.5637	10.3571	5.57333	11.3672	20
2021-06-07	2	Second time interval (n = 62)	Coastal	Coastal 07.06.2021 sig.2	0.42672	9.02175	7.83553	1.18622	7.90487	8.21251	8.67188	20
2021-06-07	2	Second time interval (n = 62)	Coastal	Coastal 07.06.2021 sig.2	0.304038	14.0156	10.7602	3.2554	14.0156	11.4783	11.0625	20
2021-06-07	2	Second time interval (n = 62)	Coastal	Coastal 07.06.2021 sig.2	0.325374	13.451	10.3875	3.06343	13.451	11.7512	10.9453	20
2021-06-07	2	Second time interval (n = 62)	Coastal	Coastal 07.06.2021 sig.2	0.77343	12.7584	6.32353	6.43484	6.34213	7.07013	7.33594	20
2021-06-07	2	Second time interval (n = 62)	Coastal	Coastal 07.06.2021 sig.2	1.47218	12.721	6.76543	5.95553	6.8253	12.721	7.03125	20
2021-06-07	2	Second time interval (n = 62)	Coastal	Coastal 07.06.2021 sig.2	2.98171	17.7796	6.90595	10.8737	6.90595	10.5412	17.6016	20
2021-06-07	2	Second time interval (n = 62)	Coastal	Coastal 07.06.2021 sig.2	2.00558	14.8199	5.30191	9.51795	5.38034	5.30191	12.6562	20
2021-06-07	2	Second time interval (n = 62)	Coastal	Coastal 07.06.2021 sig.2	2.1176	16.8641	6.58895	10.2752	13.57	6.58895	11.625	20
2021-06-07	2	Second time interval (n = 62)	Coastal	Coastal 07.06.2021 sig.2	2.77901	17.9897	6.76543	11.2243	16.2324	8.45728	10.125	20
2021-06-07	2	Second time interval (n = 62)	Coastal	Coastal 07.06.2021 sig.2	3.64846	17.7796	7.19582	10.5838	8.99529	9.82379	10.8047	20
2021-06-07	2	Second time interval (n = 62)	Coastal	Coastal 07.06.2021 sig.2	0.8001	16.6183	7.43208	9.18624	7.43208	10.2361	15.2109	20
2021-06-07	5	Second time interval (n = 62)	Coastal	Coastal 07.06.2021 sig.5	1.73888	22.0309	10.7286	11.3023	18.7448	10.7286	15.5625	20
2021-06-07	5	Second time interval (n = 62)	Coastal	Coastal 07.06.2021 sig.5	1.6162	13.9335	7.58645	6.34702	13.4115	13.451	9.02344	20
2021-06-07	5	Second time interval (n = 62)	Coastal	Coastal 07.06.2021 sig.5	1.02946	15.0391	7.97483	7.06425	11.6481	15.0391	9.1875	20
2021-06-07	5	Second time interval (n = 62)	Coastal	Coastal 07.06.2021 sig.5	0.21336	16.6672	5.72261	10.9446	16.6672	5.72261	16.7109	20
2021-06-07	5	Second time interval (n = 62)	Coastal	Coastal 07.06.2021 sig.5	0.981456	13.5302	7.74402	5.78619	11.9953	11.3776	8.25	20
2021-06-07	5	Second time interval (n = 62)	Coastal	Coastal 07.06.2021 sig.5	0.608076	14.2647	8.0928	6.17191	13.1001	14.2647	8.36719	20
2021-06-07	5	Second time interval (n = 62)	Coastal	Coastal 07.06.2021 sig.5	0.592074	10.7918	5.85865	4.93315	7.21698	10.7602	9.77344	20
2021-06-07	5	Second time interval (n = 62)	Coastal	Coastal 07.06.2021 sig.5	0.517398	12.721	6.45488	6.26608	8.35851	7.23821	10.875	20
2021-06-07	5	Second time interval (n = 62)	Coastal	Coastal 07.06.2021 sig.5	0.538734	14.3067	5.19402	9.11264	8.94261	5.19402	9.60938	20
2021-06-07	5	Second time interval (n = 62)	Coastal	Coastal 07.06.2021 sig.5	0.378714	13.8112	5.82434	7.98691	7.92812	5.82434	12.1641	20
2021-06-07	5	Second time interval (n = 62)	Coastal	Coastal 07.06.2021 sig.5	1.32817	11.9601	5.62265	6.33746	6.36078	5.62265	7.5	20
2021-06-07	5	Second time interval (n = 62)	Coastal	Coastal 07.06.2021 sig.5	1.04013	13.4115	5.0437	8.36783	6.64726	5.44391	5.36719	20
2021-06-07	5	Second time interval (n = 62)	Coastal	Coastal 07.06.2021 sig.5	0.522732	11.5121	4.11853	7.39356	4.11853	11.5121	6.51562	20
2021-06-07	5	Second time interval (n = 62)	Coastal	Coastal 07.06.2021 sig.5	0.85344	15.3515	8.6838	6.66766	12.9852	9.18213	8.64844	20
2021-06-07	5	Second time interval (n = 62)	Coastal	Coastal 07.06.2021 sig.5	0.549402	13.2549	7.11178	6.14312	13.2549	9.37285	10.1484	20
2021-06-07	5	Second time interval (n = 62)	Coastal	Coastal 07.06.2021 sig.5	0.72009	17.0634	5.77325	11.2902	17.0634	7.97483	9.84375	20
2021-06-07	5	Second time interval (n = 62)	Coastal	Coastal 07.06.2021 sig.5	0.362712	12.9471	7.36688	5.58022	12.9471	7.92812	9.16406	20
2021-06-07	5	Second time interval (n = 62)	Coastal	Coastal 07.06.2021 sig.5	0.309372	13.216	7.99828	5.21774	13.216	11.4111	8.46094	20
2021-06-07	5	Second time interval (n = 62)	Coastal	Coastal 07.06.2021 sig.5	0.389382	7.72131	5.9628	1.75851	5.9628	6.76543	7.75781	20
2021-06-07	5	Second time interval (n = 62)	Coastal	Coastal 07.06.2021 sig.5	0.336042	8.23667	6.08666	2.15001	6.19486	8.14047	8.08594	20
2021-07-25	1	First time interval (n = 98)	Oceanic	Oceanic 25.07.2021 sig.1	1.3015	13.216	6.14052	7.07551	8.35851	6.14052	11.4375	150
2021-07-25	1	First time interval (n = 98)	Oceanic	Oceanic 25.07.2021 sig.1	0.805434	15.4419	6.55036	8.89153	8.43248	6.55036	9.04688	150
2021-07-25	1	First time interval (n = 98)	Oceanic	Oceanic 25.07.2021 sig.1	1.39217	17.6755	9.73762	7.93788	15.2168	11.4447	9.91406	150
2021-07-25	1	First time interval (n = 98)	Oceanic	Oceanic 25.07.2021 sig.1	0.682752	15.9489	9.40042	6.54847	14.951	10.5103	9.49219	150
2021-07-25	1	First time interval (n = 98)	Oceanic	Oceanic 25.07.2021 sig.1	0.592074	21.3305	8.30956	13.021	8.30956	10.7918	17.1797	15
2021-07-25	1	First time interval (n = 98)	Oceanic	Oceanic 25.07.2021 sig.1	1.87757	20.2322	6.80529	13.4269	18.7448	6.8253	15.1875	150
2021-07-25	1	First time interval (n = 98)	Oceanic	Oceanic 25.07.2021 sig.1	0.37338	12.7959	5.55699	7.23891	10.7918	5.82434	5.57812	150
2021-07-25	1	First time interval (n = 98)	Oceanic	Oceanic 25.07.2021 sig.1	0.650748	19.5316	6.53115	13.0004	6.53115	19.5316	11.6484	150
2021-07-25	1	First time interval (n = 98)	Oceanic	Oceanic 25.07.2021 sig.1	1.50419	26.5085	7.36688	19.1416	20.4112	7.41028	11.6016	150
2021-07-25	1	First time interval (n = 98)	Oceanic	Oceanic 25.07.2021 sig.1	0.72009	23.0231	10.7286	12.2945	23.0231	10.7286	16.0547	150
2021-07-25	1	First time interval (n = 98)	Oceanic	Oceanic 25.07.2021 sig.1	0.197358	20.4112	13.7707	6.6405	20.4112	13.7707	14.3438	150
2021-07-25	1	First time interval (n = 98)	Oceanic	Oceanic 25.07.2021 sig.1	0.608076	22.8882	10.0573	12.8309	22.8882	10.0573	13.125	150
2021-07-25	1	First time interval (n = 98)	Oceanic	Oceanic 25.07.2021 sig.1	0.234696	22.2912	13.7304	8.56083	22.2912	13.7304	17.9062	150
2021-07-25	1	First time interval (n = 98)	Oceanic	Oceanic 25.07.2021 sig.1	0.565404	18.3095	6.8857	11.4238	6.8857	18.3095	9.5625	150
2021-07-25	1	First time interval (n = 98)	Oceanic	Oceanic 25.07.2021 sig.1	1.16281	19.9959	6.80529	13.1906	18.1489	6.84538	8.29688	150
2021-07-25	1	First time interval (n = 98)	Oceanic	Oceanic 25.07.2021 sig.1	1.01879	23.8489	7.07013	16.7788	7.97483	7.07013	13.0078	150
2021-07-25	1	First time interval (n = 98)	Oceanic	Oceanic 25.07.2021 sig.1	1.11481	21.9018	6.64726	15.2546	7.67609	10.3875	16.8281	150
2021-07-25	1	First time interval (n = 98)	Oceanic	Oceanic 25.07.2021 sig.1	1.82956	23.0231	6.8253	16.1978	6.8253	8.5071	15.4922	150
2021-07-25	1	First time interval (n = 98)	Oceanic	Oceanic 25.07.2021 sig.1	1.46685	26.9798	6.21308	20.7667	20.4112	6.58895	10.0547	150
2021-07-25	1	First time interval (n = 98)	Oceanic	Oceanic 25.07.2021 sig.1	1.65354	26.7431	7.36688	19.3762	26.7431	7.36688	7.73438	150
2021-07-25	1	First time interval (n = 98)	Oceanic	Oceanic 25.07.2021 sig.1	1.34417	8.06906	4.75598	3.31309	5.33314	5.33314	5.08594	150
2021-07-25	1	First time interval (n = 98)	Oceanic	Oceanic 25.07.2021 sig.1	1.37084	21.6461	5.75632	15.8897	6.60833	5.84147	12.6094	150
2021-07-25	1	First time interval (n = 98)	Oceanic	Oceanic 25.07.2021 sig.1	2.08559	19.9373	4.05849	15.8788	7.72131	5.23999	8.10938	150
2021-07-25	1	First time interval (n = 98)	Oceanic	Oceanic 25.07.2021 sig.1	1.02946	21.268	6.92627	14.3417	9.40042	6.92627	8.85938	150
2021-07-25	1	First time interval (n = 98)	Oceanic	Oceanic 25.07.2021 sig.1	1.52552	19.4743	6.58895	12.8854	9.68059	6.58895	13.1953	150
2021-07-25	1	First time interval (n = 98)	Oceanic	Oceanic 25.07.2021 sig.1	2.49631	17.937	5.42795	12.509	16.521	5.42795	8.74219	150
2021-07-25	1	First time interval (n = 98)	Oceanic	Oceanic 25.07.2021 sig.1	0.357378	9.12836	4.13064	4.99771	9.12836	4.20408	5.625	150
2021-07-25	1	First time interval (n = 98)	Oceanic	Oceanic 25.07.2021 sig.1	0.912114	17.5205	7.49785	10.0226	11.3443	7.49785	14.0859	150
2021-07-25	1	First time interval (n = 98)	Oceanic	Oceanic 25.07.2021 sig.1	0.501396	18.7448	10.2061	8.5387	18.7448	10.2361	11.6953	150
2021-07-25	1	First time interval (n = 98)	Oceanic	Oceanic 25.07.2021 sig.1	1.84556	23.1587	8.83817	14.3205	9.04828	8.91639	14.0391	150
2021-07-25	1	First time interval (n = 98)	Oceanic	Oceanic 25.07.2021 sig.1	0.762762	15.2168	4.49786	10.7189	4.55101	4.53767	5.17969	150
2021-07-25	1	First time interval (n = 98)	Oceanic	Oceanic 25.07.2021 sig.1	1.44018	15.809	4.59129	11.2177	5.23999	9.23622	6.14062	150
2021-07-25	1	First time interval (n = 98)	Oceanic	Oceanic 25.07.2021 sig.1	1.57886	18.635	4.4193	14.2157	9.42807	4.4193	11.5547	150
2021-07-25	1	First time interval (n = 98)	Oceanic	Oceanic 25.07.2021 sig.1	1.09347	18.4716	6.72581	11.7458	17.7796	6.72581	10.0547	150
2021-07-25	1	First time interval (n = 98)	Oceanic	Oceanic 25.07.2021 sig.1	1.10947	18.1489	9.37285	8.77607	15.1722	9.37285	16.6641	150
2021-07-25	1	First time interval (n = 98)	Oceanic	Oceanic 25.07.2021 sig.1	1.66954	21.3305	4.59129	16.7392	8.78641	6.45488	6.5625	150
2021-07-25	1	First time interval (n = 98)	Oceanic	Oceanic 25.07.2021 sig.1	1.46685	18.7999	4.13064	14.6693	18.7999	4.13064	10.5469	150
2021-07-25	1	First time interval (n = 98)	Oceanic	Oceanic 25.07.2021 sig.1	0.368046	11.7512	7.69867	4.05253	7.99828	10.1463	9.53906	150
2021-07-25	1	First time interval (n = 98)	Oceanic	Oceanic 25.07.2021 sig.1	0.869442	20.5919	6.512	14.0799	9.96911	6.53115	7.96875	150
2021-07-25	1	First time interval (n = 98)	Oceanic	Oceanic 25.07.2021 sig.1	0.714756	20.7741	7.17472	13.5994	9.12836	7.65358	18.2812	150
2021-07-25	1	First time interval (n = 98)	Oceanic	Oceanic 25.07.2021 sig.1	1.66421	22.9556	4.14279	18.8128	4.70043	6.4929	20.1562	150
2021-07-25	1	First time interval (n = 98)	Oceanic	Oceanic 25.07.2021 sig.1	1.64821	18.5804	6.68642	11.894	7.72131	6.96707	12.4219	150
2021-07-25	1	First time interval (n = 98)	Oceanic	Oceanic 25.07.2021 sig.1	1.28016	22.6875	7.07013	15.6173	10.0869	7.11178	10.4062	150
2021-07-25	1	First time interval (n = 98)	Oceanic	Oceanic 25.07.2021 sig.1	2.22961	21.9663	5.58972	16.3765	12.6465	5.58972	10.9219	150
2021-07-25	1	Second time interval (n = 44)	Oceanic	Oceanic 25.07.2021 sig.1	1.49885	17.937	6.66681	11.2702	6.66681	7.15368	7.61719	150
2021-07-25	1	Second time interval (n = 44)	Oceanic	Oceanic 25.07.2021 sig.1	0.96012	19.1342	7.90487	11.2293	13.2549	7.90487	17.8359	150
2021-07-25	1	Second time interval (n = 44)	Oceanic	Oceanic 25.07.2021 sig.1	0.69342	27.7024	11.2118	16.4906	27.7024	11.2118	13.6406	150
2021-07-25	1	Second time interval (n = 44)	Oceanic	Oceanic 25.07.2021 sig.1	0.656082	23.0908	11.8552	11.2356	13.8112	11.8552	15.1875	150
2021-07-25	1	Second time interval (n = 44)	Oceanic	Oceanic 25.07.2021 sig.1	1.39217	24.06	6.62777	17.4322	14.6899	6.62777	13.6406	150
2021-07-25	1	Second time interval (n = 44)	Oceanic	Oceanic 25.07.2021 sig.1	1.34417	20.2322	5.85865	14.3735	14.4333	5.85865	12.5625	150
2021-07-25	1	Second time interval (n = 44)	Oceanic	Oceanic 25.07.2021 sig.1	1.54153	21.5826	8.26089	13.3217	9.99843	8.26089	13.0078	150
2021-07-25	1	Second time interval (n = 44)	Oceanic	Oceanic 25.07.2021 sig.1	1.61087	18.7448	6.68642	12.0584	6.68642	7.69867	10.4766	150
2021-07-25	1	Second time interval (n = 44)	Oceanic	Oceanic 25.07.2021 sig.1	1.35484	18.4174	6.47386	11.9435	9.88167	7.58645	12.3047	150
2021-07-25	1	Second time interval (n = 44)	Oceanic	Oceanic 25.07.2021 sig.1	0.405384	21.6461	10.5412	11.1048	11.2778	10.8554	11.5547	150
2021-07-25	1	Second time interval (n = 44)	Oceanic	Oceanic 25.07.2021 sig.1	0.40005	16.0428	9.23622	6.80662	16.0428	9.23622	15.8906	150
2021-07-25	1	Second time interval (n = 44)	Oceanic	Oceanic 25.07.2021 sig.1	0.821436	19.4172	5.02891	14.3883	7.95144	5.05853	11.3203	150
2021-07-25	1	Second time interval (n = 44)	Oceanic	Oceanic 25.07.2021 sig.1	2.1656	20.4713	4.84053	15.6307	18.3095	8.38309	10.6875	150
2021-07-25	1	Second time interval (n = 44)	Oceanic	Oceanic 25.07.2021 sig.1	1.38684	21.3933	7.5642	13.8291	9.85269	7.5642	15.4219	150
2021-07-25	1	Second time interval (n = 44)	Oceanic	Oceanic 25.07.2021 sig.1	1.48819	14.4757	7.58645	6.88928	8.23667	7.63114	13.1719	150
2021-07-25	1	Second time interval (n = 44)	Oceanic	Oceanic 25.07.2021 sig.1	0.538734	23.2268	8.18843	15.0384	8.18843	18.1489	10.1719	150
2021-07-25	1	Second time interval (n = 44)	Oceanic	Oceanic 25.07.2021 sig.1	1.95224	18.9107	6.19486	12.7158	7.47586	6.19486	10.9219	150
2021-07-25	1	Second time interval (n = 44)	Oceanic	Oceanic 25.07.2021 sig.1	1.76022	19.5316	6.8857	12.6459	7.54202	7.19582	8.13281	150
2021-07-25	1	Second time interval (n = 44)	Oceanic	Oceanic 25.07.2021 sig.1	3.80848	21.9018	5.39616	16.5057	7.7668	5.39616	17.6484	150
2021-07-25	1	Second time interval (n = 44)	Oceanic	Oceanic 25.07.2021 sig.1	1.00813	19.8788	5.14846	14.7303	5.14846	10.3875	11.2969	150
2021-07-25	1	Second time interval (n = 44)	Oceanic	Oceanic 25.07.2021 sig.1	0.528066	19.2469	8.86417	10.3827	8.94261	19.2469	9.84375	150
2021-07-25	1	Second time interval (n = 44)	Oceanic	Oceanic 25.07.2021 sig.1	0.565404	22.7542	8.78641	13.9678	8.81226	21.7097	8.95312	150
2021-07-25	1	Second time interval (n = 44)	Oceanic	Oceanic 25.07.2021 sig.1	1.01879	19.589	10.9837	8.60538	17.1136	12.066	19.5938	150
2021-07-25	1	Second time interval (n = 44)	Oceanic	Oceanic 25.07.2021 sig.1	1.0348	22.8882	5.62265	17.2656	7.99828	5.65578	17.9297	150
2021-07-25	1	Second time interval (n = 44)	Oceanic	Oceanic 25.07.2021 sig.1	0.405384	16.1374	7.88169	8.25566	12.2444	7.88169	9.53906	150
2021-07-25	1	Second time interval (n = 44)	Oceanic	Oceanic 25.07.2021 sig.1	2.30962	22.8882	7.15368	15.7346	12.3166	15.5329	15.4453	150
2021-07-25	1	Second time interval (n = 44)	Oceanic	Oceanic 25.07.2021 sig.1	1.32283	14.5183	6.53115	7.98715	7.23821	6.80529	6.72656	150
2021-07-25	1	Second time interval (n = 44)	Oceanic	Oceanic 25.07.2021 sig.1	0.522732	17.0634	6.21308	10.8503	17.0634	6.21308	7.38281	150
2021-07-25	1	Second time interval (n = 44)	Oceanic	Oceanic 25.07.2021 sig.1	2.51231	19.8788	8.02181	11.857	8.02181	11.2118	11.1562	150
2021-07-25	1	Second time interval (n = 44)	Oceanic	Oceanic 25.07.2021 sig.1	2.4003	19.8788	9.68059	10.1982	9.68059	10.4795	11.8125	150
2021-07-25	1	Second time interval (n = 44)	Oceanic	Oceanic 25.07.2021 sig.1	1.62687	16.9137	5.1636	11.7501	10.7918	5.22462	10.3594	150
2021-07-25	1	Second time interval (n = 44)	Oceanic	Oceanic 25.07.2021 sig.1	1.63754	18.6898	6.06881	12.621	6.45488	6.06881	9.82031	150
2021-07-25	1	Second time interval (n = 44)	Oceanic	Oceanic 25.07.2021 sig.1	1.49352	18.7448	7.63114	11.1137	7.63114	9.20914	18.4688	150
2021-07-25	1	Second time interval (n = 44)	Oceanic	Oceanic 25.07.2021 sig.1	0.922782	12.5355	4.6592	7.87632	5.70583	4.67291	7.54688	150
2021-08-02	2	First time interval (n = 98)	Oceanic	Oceanic 02.08.2021 sig.2	1.63754	21.9663	8.58238	13.3839	14.4757	8.58238	10.2891	150
2021-08-02	2	First time interval (n = 98)	Oceanic	Oceanic 02.08.2021 sig.2	0.629412	18.0957	15.0391	3.05662	16.09	18.0426	17.5078	40
2021-08-02	2	First time interval (n = 98)	Oceanic	Oceanic 02.08.2021 sig.2	1.55219	17.2144	5.98034	11.2341	14.9072	6.58895	8.46094	40
2021-08-02	2	First time interval (n = 98)	Oceanic	Oceanic 02.08.2021 sig.2	1.23204	19.3035	7.69867	11.6048	12.4988	7.69867	10.8281	40
2021-08-02	2	First time interval (n = 98)	Oceanic	Oceanic 02.08.2021 sig.2	0.757357	17.9897	9.40042	8.58931	14.7331	9.40042	14.0156	40
2021-08-02	2	First time interval (n = 98)	Oceanic	Oceanic 02.08.2021 sig.2	0.848106	13.0234	5.89317	7.13021	5.92788	7.21698	8.97656	40
2021-08-02	2	First time interval (n = 98)	Oceanic	Oceanic 02.08.2021 sig.2	0.714756	16.7654	6.70608	10.0593	6.70608	7.09092	13.6406	40
2021-08-02	2	First time interval (n = 98)	Oceanic	Oceanic 02.08.2021 sig.2	1.08814	17.3158	5.85865	11.4572	15.5785	15.3515	10.4062	40
2021-08-02	2	First time interval (n = 98)	Oceanic	Oceanic 02.08.2021 sig.2	0.848106	14.0981	7.11178	6.98634	8.6838	7.11178	10.0547	40
2021-08-02	2	First time interval (n = 98)	Oceanic	Oceanic 02.08.2021 sig.2	1.23749	23.3637	6.23135	17.1323	23.3637	7.88169	8.88281	40
2021-08-02	2	First time interval (n = 98)	Oceanic	Oceanic 02.08.2021 sig.2	1.41884	17.4178	7.5199	9.89795	16.7162	7.74402	10.5234	40
2021-08-02	2	First time interval (n = 98)	Oceanic	Oceanic 02.08.2021 sig.2	1.10414	22.1606	7.15368	15.007	7.15368	16.0428	14.7422	40
2021-08-02	2	First time interval (n = 98)	Oceanic	Oceanic 02.08.2021 sig.2	1.3495	18.635	6.68642	11.9486	6.68642	12.2805	18.1406	40
2021-08-02	2	First time interval (n = 98)	Oceanic	Oceanic 02.08.2021 sig.2	0.304038	10.2662	6.30499	3.96124	7.2595	6.30499	10.3125	40
2021-08-02	2	First time interval (n = 98)	Oceanic	Oceanic 02.08.2021 sig.2	1.38151	26.7431	4.67291	22.0702	26.7431	5.28636	8.36719	40
2021-08-02	2	First time interval (n = 98)	Oceanic	Oceanic 02.08.2021 sig.2	1.43485	27.1387	4.17945	22.9593	26.5085	4.17945	10.2891	40
2021-08-02	2	First time interval (n = 98)	Oceanic	Oceanic 02.08.2021 sig.2	0.61341	28.612	11.9953	16.6167	28.612	13.216	15.0938	40
2021-08-02	2	First time interval (n = 98)	Oceanic	Oceanic 02.08.2021 sig.2	1.21082	12.6094	4.92658	7.6828	6.34213	4.92658	5.88281	40
2021-08-02	2	First time interval (n = 98)	Oceanic	Oceanic 02.08.2021 sig.2	1.07747	14.3909	4.74203	9.64892	7.83553	6.12251	11.1328	40
2021-08-02	2	First time interval (n = 98)	Oceanic	Oceanic 02.08.2021 sig.2	1.46152	24.4159	4.51109	19.9048	24.06	4.51109	7.57031	40
2021-08-02	2	First time interval (n = 98)	Oceanic	Oceanic 02.08.2021 sig.2	1.25882	16.2324	7.65358	8.57884	13.8519	7.65358	8.83594	40
2021-08-02	2	First time interval (n = 98)	Oceanic	Oceanic 02.08.2021 sig.2	1.47218	16.2802	5.67241	10.6078	12.9471	6.26806	7.10156	40
2021-08-02	2	First time interval (n = 98)	Oceanic	Oceanic 02.08.2021 sig.2	1.35484	16.5696	6.86551	9.70407	13.8112	6.86551	9.02344	40
2021-08-02	2	First time interval (n = 98)	Oceanic	Oceanic 02.08.2021 sig.2	1.3495	24.4877	5.02891	19.4588	23.9894	5.02891	16.6641	40
2021-08-02	2	First time interval (n = 98)	Oceanic	Oceanic 02.08.2021 sig.2	1.6002	17.1639	6.8253	10.3386	13.7707	6.8253	8.34375	40
2021-08-02	2	First time interval (n = 98)	Oceanic	Oceanic 02.08.2021 sig.2	1.13614	20.1137	4.76997	15.3437	20.1137	4.76997	8.36719	40
2021-08-02	2	First time interval (n = 98)	Oceanic	Oceanic 02.08.2021 sig.2	1.0828	24.7771	6.21308	18.564	24.7771	7.11178	8.57812	40
2021-08-02	2	First time interval (n = 98)	Oceanic	Oceanic 02.08.2021 sig.2	0.810768	14.561	7.07013	7.49087	8.58238	7.07013	12.6328	40
2021-08-02	2	First time interval (n = 98)	Oceanic	Oceanic 02.08.2021 sig.2	0.96012	17.6237	6.41707	11.2066	6.4929	10.2964	7.66406	40
2021-08-02	2	First time interval (n = 98)	Oceanic	Oceanic 02.08.2021 sig.2	2.01625	13.1001	7.1327	5.9674	7.21698	13.1001	10.1953	40
2021-08-02	2	First time interval (n = 98)	Oceanic	Oceanic 02.08.2021 sig.2	0.5334	11.5121	6.14052	5.37157	6.21308	11.5121	7.28906	40
2021-08-02	2	First time interval (n = 98)	Oceanic	Oceanic 02.08.2021 sig.2	1.0668	16.8147	10.3875	6.42714	11.1134	12.5355	16.125	40
2021-08-02	2	First time interval (n = 98)	Oceanic	Oceanic 02.08.2021 sig.2	1.10947	15.6703	5.9105	9.75982	5.9105	8.6838	11.625	40
2021-08-02	2	First time interval (n = 98)	Oceanic	Oceanic 02.08.2021 sig.2	1.11481	18.6898	8.70934	9.9805	9.20914	8.70934	13.3594	40
2021-08-02	2	First time interval (n = 98)	Oceanic	Oceanic 02.08.2021 sig.2	1.32283	14.7331	4.34211	10.391	6.86551	4.34211	11.1328	40
2021-08-02	2	First time interval (n = 98)	Oceanic	Oceanic 02.08.2021 sig.2	0.917448	15.3515	7.34528	8.00617	7.34528	8.35851	13.0781	40
2021-08-02	2	First time interval (n = 98)	Oceanic	Oceanic 02.08.2021 sig.2	0.789432	18.1489	7.00811	11.1408	7.00811	11.4111	11.4141	40
2021-08-02	2	First time interval (n = 98)	Oceanic	Oceanic 02.08.2021 sig.2	0.869442	15.5785	9.73762	5.84092	10.8554	9.85269	12.4688	40
2021-08-02	2	First time interval (n = 98)	Oceanic	Oceanic 02.08.2021 sig.2	0.288036	15.6244	6.03326	9.5911	6.03326	14.6038	13.6406	40
2021-08-02	2	First time interval (n = 98)	Oceanic	Oceanic 02.08.2021 sig.2	0.768096	14.6468	5.50824	9.13854	5.50824	6.72581	11.4844	40
2021-08-02	2	First time interval (n = 98)	Oceanic	Oceanic 02.08.2021 sig.2	0.517398	12.5355	7.17472	5.36081	12.2085	7.17472	7.38281	40
2021-08-02	2	First time interval (n = 98)	Oceanic	Oceanic 02.08.2021 sig.2	1.0988	23.7093	8.53212	15.1771	23.7093	8.53212	10.2188	40
2021-08-02	2	First time interval (n = 98)	Oceanic	Oceanic 02.08.2021 sig.2	1.09347	19.4172	7.97483	11.4424	19.4172	8.48215	10.3359	40
2021-08-02	2	First time interval (n = 98)	Oceanic	Oceanic 02.08.2021 sig.2	0.805434	20.7132	9.4558	11.2574	20.7132	9.4558	15.3047	40
2021-08-02	2	First time interval (n = 98)	Oceanic	Oceanic 02.08.2021 sig.2	1.31216	25.893	6.23135	19.6616	25.893	12.721	10.6641	40
2021-08-02	2	Second time interval (n = 44)	Oceanic	Oceanic 02.08.2021 sig.2	1.08814	25.5155	9.91073	15.6048	9.91073	10.7602	19.2422	40
2021-08-02	2	Second time interval (n = 44)	Oceanic	Oceanic 02.08.2021 sig.2	2.53898	25.6658	8.76065	16.9052	11.3443	9.76626	19.3359	40
2021-08-02	2	Second time interval (n = 44)	Oceanic	Oceanic 02.08.2021 sig.2	1.45618	28.1122	8.89024	19.222	8.89024	9.40042	18.9609	40
2021-08-02	2	Second time interval (n = 44)	Oceanic	Oceanic 02.08.2021 sig.2	0.56007	15.3515	7.83553	7.51592	7.83553	7.95144	10.9453	40
2021-08-02	2	Second time interval (n = 44)	Oceanic	Oceanic 02.08.2021 sig.2	2.06959	18.2023	8.65833	9.54397	11.016	8.65833	13.0312	40
2021-08-02	2	Second time interval (n = 44)	Oceanic	Oceanic 02.08.2021 sig.2	0.45339	19.8205	8.53212	11.2884	8.53212	9.79498	19.5234	40
2021-08-02	2	Second time interval (n = 44)	Oceanic	Oceanic 02.08.2021 sig.2	0.752094	16.8641	4.70043	12.1637	16.7654	4.70043	9.63281	40
2021-08-24	1	First time interval (n = 62)	Coastal	Coastal 24.08.2021 sig.1	1.65354	13.6099	6.60833	7.00159	6.60833	8.6838	8.50781	40
2021-08-24	1	First time interval (n = 62)	Coastal	Coastal 24.08.2021 sig.1	1.17348	21.7097	5.79023	15.9195	10.0278	9.29064	9.72656	10
2021-08-24	1	First time interval (n = 62)	Coastal	Coastal 24.08.2021 sig.1	1.29083	14.3067	6.66681	7.63986	6.66681	9.29064	10.2656	10
2021-08-24	1	First time interval (n = 62)	Coastal	Coastal 24.08.2021 sig.1	0.672084	12.9852	5.11831	7.86688	12.9852	6.72581	6.9375	10
2021-08-24	1	First time interval (n = 62)	Coastal	Coastal 24.08.2021 sig.1	1.81889	21.3305	4.84053	16.49	16.328	8.70934	10.4531	10
2021-08-24	1	First time interval (n = 62)	Coastal	Coastal 24.08.2021 sig.1	1.81356	21.4562	5.2093	16.2469	20.8352	8.65833	5.17969	10
2021-08-24	1	Second time interval (n = 62)	Coastal	Coastal 24.08.2021 sig.1	3.51511	20.5315	5.19402	15.3375	17.6237	8.26089	9.84375	10
2021-08-24	1	Second time interval (n = 62)	Coastal	Coastal 24.08.2021 sig.1	2.54432	21.7736	5.13336	16.6402	19.3035	7.38855	10.4062	10
2021-08-24	1	Second time interval (n = 62)	Coastal	Coastal 24.08.2021 sig.1	1.22682	21.0196	5.28636	15.7332	20.3514	8.02181	12.3281	10
2021-08-24	1	Second time interval (n = 62)	Coastal	Coastal 24.08.2021 sig.1	1.23215	21.5193	5.11831	16.401	19.9373	9.02175	9.79688	10
2021-08-24	1	Second time interval (n = 62)	Coastal	Coastal 24.08.2021 sig.1	3.34442	21.5826	5.0437	16.5389	8.35851	8.45728	10.0312	10
2021-08-24	1	Second time interval (n = 62)	Coastal	Coastal 24.08.2021 sig.1	1.14148	21.0814	4.84053	16.2409	9.59567	8.40775	11.1094	10
2021-08-24	1	Second time interval (n = 62)	Coastal	Coastal 24.08.2021 sig.1	2.60299	21.268	5.17879	16.0892	8.63294	8.334	11.5312	10
2021-09-07	1	First time interval (n = 62)	Coastal	Coastal 07.09.2021 sig.1	0.565404	13.1001	8.76065	4.33945	13.1001	8.83817	12.4453	40
2021-09-07	1	Second time interval (n = 62)	Coastal	Coastal 07.09.2021 sig.1	1.10947	14.3487	7.07013	7.27862	12.9091	7.11178	7.85156	40
2021-09-07	1	Second time interval (n = 62)	Coastal	Coastal 07.09.2021 sig.1	1.51486	11.0484	5.85865	5.1897	7.41028	6.05101	9.5625	40
2021-09-07	1	Second time interval (n = 62)	Coastal	Coastal 07.09.2021 sig.1	1.41884	15.6703	3.71622	11.9541	12.4621	3.71622	4.73438	40
2021-09-07	1	Second time interval (n = 62)	Coastal	Coastal 07.09.2021 sig.1	1.11481	14.4757	7.95144	6.52428	7.95144	9.79498	10.0547	40
2021-09-07	1	Second time interval (n = 62)	Coastal	Coastal 07.09.2021 sig.1	1.13614	14.6038	9.31796	5.28587	10.0869	9.31796	12.0469	40
2021-09-07	1	Second time interval (n = 62)	Coastal	Coastal 07.09.2021 sig.1	1.15214	17.2144	9.85269	7.36174	12.3891	9.91073	10.2188	40
