# Supplementary material for: Changes in whistle parameters of two common bottlenose dolphin ecotypes as a result of the physical presence of the research vessel
Source: PeerJ. 2022 Oct 7;10:e14074. doi: 10.7717/peerj.14074 (PMC9549881; doi:10.7717/peerj.14074)
Supplement: Supplemental Information 3 [file peerj-10-14074-s003.xlsx]

## Sheet: Rateo
Recording	Date (dd/mm/yyyy)	Ecotype	Group ID	Latitud	Longitud	Total whistles	Stereotypes	Proportion	Group size	Rate	Time interval
1	2020-10-30	Coastal	Coastal 30102020_1	24.2226	-110.334	3	2	0.666667	10	0.06	First (n = 81)
1	2020-10-30	Coastal	Coastal 30102020_1	24.2226	-110.334	2	0	0	10	0.04	Second (n = 83)
2	2020-10-30	Coastal	Coastal 30102020_2	24.1434	-110.398	0	0	NA	10	0	First (n = 81)
2	2020-10-30	Coastal	Coastal 30102020_2	24.1434	-110.398	1	0	0	10	0.02	Second (n = 83)
3	2021-04-25	Coastal	Coastal_25042021_1	24.1709	-110.317	1	0	0	25	0.008	First (n = 81)
3	2021-04-25	Coastal	Coastal_25042021_1	24.1709	-110.317	1	0	0	25	0.008	Second (n = 83)
4	2021-05-06	Oceanic	Oceanic_06052021_1	24.4377	-110.294	4	2	0.5	30	0.0266667	First (n = 127)
4	2021-05-06	Oceanic	Oceanic_06052021_1	24.4377	-110.294	0	0	NA	30	0	Second (n = 56)
5	2021-05-14	Coastal	Coastal_14052021_1	24.1497	-110.347	13	2	0.153846	50	0.052	First (n = 81)
5	2021-05-14	Coastal	Coastal_14052021_1	24.1497	-110.347	7	0	0	50	0.028	Second (n = 83)
6	2021-05-14	Coastal	Coastal_14052021_1	24.148	-110.354	15	0	0	50	0.06	First (n = 81)
6	2021-05-14	Coastal	Coastal_14052021_1	24.148	-110.354	6	0	0	50	0.024	Second (n = 83)
7	2021-05-16	Oceanic	Oceanic_16052021_1	24.5237	-110.293	8	2	0.25	50	0.032	First (n = 127)
7	2021-05-16	Oceanic	Oceanic_16052021_1	24.5237	-110.293	5	4	0.8	50	0.02	Second (n = 56)
8	2021-06-07	Coastal	Coastal_07062021_1	24.1497	-110.351	18	13	0.722222	20	0.18	First (n = 81)
8	2021-06-07	Coastal	Coastal_07062021_1	24.1497	-110.351	7	2	0.285714	20	0.07	Second (n = 83)
9	2021-06-07	Coastal	Coastal_07062021_1	24.1515	-110.35	6	3	0.5	20	0.06	First (n = 81)
9	2021-06-07	Coastal	Coastal_07062021_1	24.1515	-110.35	8	3	0.375	20	0.08	Second (n = 83)
10	2021-06-07	Coastal	Coastal_07062021_2	24.177	-110.397	1	0	0	20	0.01	First (n = 81)
10	2021-06-07	Coastal	Coastal_07062021_2	24.177	-110.397	1	0	0	20	0.01	Second (n = 83)
11	2021-06-07	Coastal	Coastal_07062021_2	24.1788	-110.405	3	0	0	20	0.03	First (n = 81)
11	2021-06-07	Coastal	Coastal_07062021_2	24.1788	-110.405	11	3	0.272727	20	0.11	Second (n = 83)
12	2021-06-07	Coastal	Coastal_07062021_2	24.1838	-110.428	12	6	0.5	20	0.12	First (n = 81)
12	2021-06-07	Coastal	Coastal_07062021_2	24.1838	-110.428	10	0	0	20	0.1	Second (n = 83)
13	2021-07-25	Oceanic	Oceanic_25072021_1	24.4017	-110.421	16	0	0	150	0.0213333	First (n = 127)
13	2021-07-25	Oceanic	Oceanic_25072021_1	24.4017	-110.421	10	0	0	150	0.0133333	Second (n = 56)
14	2021-07-25	Oceanic	Oceanic_25072021_1	24.3971	-110.426	4	3	0.75	150	0.00533333	First (n = 127)
14	2021-07-25	Oceanic	Oceanic_25072021_1	24.3971	-110.426	3	1	0.333333	150	0.004	Second (n = 56)
15	2021-07-25	Oceanic	Oceanic_25072021_1	24.39	-110.439	13	6	0.461538	150	0.0173333	First (n = 127)
15	2021-07-25	Oceanic	Oceanic_25072021_1	24.39	-110.439	3	0	0	150	0.004	Second (n = 56)
16	2021-07-25	Oceanic	Oceanic_25072021_1	24.4273	-110.472	16	2	0.125	150	0.0213333	First (n = 127)
16	2021-07-25	Oceanic	Oceanic_25072021_1	24.4273	-110.472	26	11	0.423077	150	0.0346667	Second (n = 56)
17	2021-08-02	Oceanic	Oceanic_02082021_1	24.3882	-110.413	1	0	0	40	0.005	First (n = 127)
17	2021-08-02	Oceanic	Oceanic_02082021_1	24.3882	-110.413	0	0	NA	40	0	Second (n = 56)
18	2021-08-02	Oceanic	Oceanic_02082021_1	24.3904	-110.428	5	4	0.8	40	0.025	First (n = 127)
18	2021-08-02	Oceanic	Oceanic_02082021_1	24.3904	-110.428	0	0	NA	40	0	Second (n = 56)
19	2021-08-02	Oceanic	Oceanic_02082021_1	24.4042	-110.425	8	5	0.625	40	0.04	First (n = 127)
19	2021-08-02	Oceanic	Oceanic_02082021_1	24.4042	-110.425	0	0	NA	40	0	Second (n = 56)
20	2021-08-02	Oceanic	Oceanic_02082021_1	24.4168	-110.425	32	16	0.5	40	0.16	First (n = 127)
20	2021-08-02	Oceanic	Oceanic_02082021_1	24.4168	-110.425	5	3	0.6	40	0.025	Second (n = 56)
21	2021-08-02	Oceanic	Oceanic_02082021_1	24.4101	-110.435	13	4	0.307692	40	0.065	First (n = 127)
21	2021-08-02	Oceanic	Oceanic_02082021_1	24.4101	-110.435	0	0	NA	40	0	Second (n = 56)
22	2021-08-02	Oceanic	Oceanic_02082021_1	24.3988	-110.447	7	2	0.285714	40	0.035	First (n = 127)
22	2021-08-02	Oceanic	Oceanic_02082021_1	24.3988	-110.447	4	0	0	40	0.02	Second (n = 56)
23	2021-08-24	Coastal	Coastal_24082021_1	24.143	-110.375	2	2	1	10	0.04	First (n = 81)
23	2021-08-24	Coastal	Coastal_24082021_1	24.143	-110.375	20	14	0.7	10	0.4	Second (n = 83)
24	2021-08-24	Coastal	Coastal_24082021_1	24.1429	-110.382	6	1	0.166667	10	0.12	First (n = 81)
24	2021-08-24	Coastal	Coastal_24082021_1	24.1429	-110.382	0	0	NA	10	0	Second (n = 83)
25	2021-09-07	Coastal	Coastal_07092021_1	24.1865	-110.307	1	0	0	40	0.005	First (n = 81)
25	2021-09-07	Coastal	Coastal_07092021_1	24.1865	-110.307	9	4	0.444444	40	0.045	Second (n = 83)
