# Supplementary material for: Changes in whistle parameters of two common bottlenose dolphin ecotypes as a result of the physical presence of the research vessel
Source: PeerJ. 2022 Oct 7;10:e14074. doi: 10.7717/peerj.14074 (PMC9549881; doi:10.7717/peerj.14074)
Supplement: Supplemental Information 4 [file peerj-10-14074-s004.xlsx]

## Sheet: Dataset
Date (dd/mm/yyyy)	Time	Latitude	Longitude	Type	Distance (m)	Bearing (°)	Latitude vessel	Longitude vessel
13/10/2020	09:06	24.25173	-110.442	Ferry	7,000	90	24.2517	-110.373164
13/10/2020	11:26	24.47097	-110.5267	Touristic panga	10,000	30	24.5488	-110.477279
13/10/2020	11:26	24.47097	-110.527	Cargo	500	45	24.4742	-110.523208
13/10/2020	11.39	24.4962	-110.507	Yacht	3,000	270	24.4962	-110.536
13/10/2020	12:07	24.5517	-110.46	Touristic panga	1,000	90	24.5517	-110.45
13/10/2020	12:09	24.5546	-110.457	Touristic panga	1,000	90	24.5546	-110.447
13/10/2020	12:13	24.5614	-110.44	Touristic panga	200	90	24.5614	-110.438
13/10/2020	12:13	24.5614	-110.44	Touristic panga	500	90	24.5614	-110.438
13/10/2020	12:13	24.5614	-110.44	Touristic panga	500	120	24.5591	-110.436
13/10/2020	12:13	24.5614	-110.44	Ferry	1,000	90	24.5614	-110.43
13/10/2020	12:21	24.5719	-110.427	Touristic panga	500	150	24.568	-110.425
13/10/2020	12:21	24.5719	-110.427	Touristic panga	1,000	180	24.5629	-110.427
13/10/2020	12:21	24.5719	-110.427	Touristic panga	1,000	0	24.5809	-110.427
13/10/2020	13:01	24.537	-110.362	Touristic panga	500	210	24.5331	-110.365
13/10/2020	13:33	24.4748	-110.407	Yacht	100	90	24.4748	-110.406
13/10/2020	13:38	24.4612	-110.401	Touristic panga	1,000	90	24.4612	-110.391
13/10/2020	13:38	24.4612	-110.401	Touristic panga	1,000	120	24.4567	-110.393
13/10/2020	13:38	24.4612	-110.401	Touristic panga	1,000	140	24.4543	-110.395
13/10/2020	13:48	24.4608	-110.401	Yacht	200	0	24.4626	-110.401
13/10/2020	13:59	24.4458	-110.393	Sailing boat	300	90	24.4458	-110.39
13/10/2020	14:03	24.4353	-110.389	Yacht	1,000	90	24.4353	-110.379
13/10/2020	14:15	24.409	-110.377	Sailing boat	500	45	24.4122	-110.373
13/10/2020	14:31	24.3618	-110.364	Touristic panga	2,000	135	24.349	-110.35
13/10/2020	14:51	24.2988	-110.347	Sailing boat	100	180	24.2979	-110.347
13/10/2020	14:56	24.2986	-110.345	Ferry	800	180	24.2914	-110.345
13/10/2020	15:05	24.2613	-110.343	Touristic panga	200	90	24.2613	-110.341
13/10/2020	15:16	24.2171	-110.319	Sailing boat	200	180	24.2153	-110.319
13/10/2020	15:26	24.1812	-110.308	Fishing panga	50	180	24.1808	-110.308
13/10/2020	15:26	24.1812	-110.308	Fishing panga	700	180	24.1749	-110.308
13/10/2020	15:26	24.1812	-110.308	Fishing panga	500	180	24.1767	-110.308
13/10/2020	15:33	24.16	-110.333	Fishing panga	50	225	24.1597	-110.333
17/10/2020	08:10	24.1678	-110.325	Fishing panga	200	90	24.1678	-110.323
17/10/2020	08:22	24.1828	-110.343	Ferry	3,000	0	24.2097	-110.343
17/10/2020	13:13	24.6684	-110.45	Yacht	1,000	0	24.6774	-110.45
17/10/2020	14:37	24.5356	-110.363	Yacht	2,000	90	24.5356	-110.344
17/10/2020	14:42	24.5308	-110.366	Touristic panga	50	0	24.5313	-110.366
17/10/2020	16:11	24.52	-110.323	Touristic panga	100	270	24.52	-110.324
17/10/2020	16:22	24.5158	-110.315	Touristic panga	1000	315	24.5221	-110.322
17/10/2020	16:27	24.5158	-110.315	Touristic panga	300	315	24.5177	-110.317
17/10/2020	16:27	24.5158	-110.315	Touristic panga	500	335	24.5199	-110.317
17/10/2020	16:44	24.4878	-110.293	Yacht	1,000	180	24.4788	-110.293
17/10/2020	16:49	24.475	-110.287	Touristic panga	500	135	24.4718	-110.284
17/10/2020	17:09	24.4206	-110.294	Fishing panga	1,000	225	24.4143	-110.301
17/10/2020	17:18	24.3992	-110.301	Yacht	1,000	180	24.3902	-110.301
17/10/2020	17:41	24.392	-110.332	Yacht	600	135	24.3882	-110.327
17/10/2020	17:41	24.392	-110.332	Touristic panga	1,000	135	24.3856	-110.325
17/10/2020	17:41	24.392	-110.332	Yacht	600	180	24.3866	-110.332
17/10/2020	17:47	24.3176	-110.342	Fishing panga	50	180	24.3171	-110.342
17/10/2020	17:47	24.3176	-110.342	Fishing panga	500	225	24.3144	-110.345
17/10/2020	17:56	24.2799	-110.343	Touristic panga	100	180	24.279	-110.343
17/10/2020	17:58	24.2792	-110.343	Touristic panga	500	180	24.2747	-110.343
17/10/2020	18:05	24.2695	-110.345	Touristic panga	200	180	24.2677	-110.345
17/10/2020	18:25:00	24.2647	-110.352	Touristic panga	300	180	24.262	-110.352
17/10/2020	18:31:00	24.2647	-110.352	Touristic panga	200	180	24.2629	-110.352
17/10/2020	18:34:00	24.2647	-110.352	Touristic panga	150	90	24.2647	-110.351
17/10/2020	18:34:00	24.2647	-110.352	Touristic panga	150	80	24.2649	-110.351
17/10/2020	18:34:00	24.2647	-110.352	Touristic panga	150	70	24.2651	-110.351
17/10/2020	18:34:00	24.2647	-110.352	Yacht	150	60	24.2653	-110.351
23/10/2020	10:41	24.1555	-110.341	Touristic panga	50	225	24.1552	-110.341
23/10/2020	10:47	24.1484	-110.381	Touristic panga	50	225	24.1481	-110.381
23/10/2020	11:00	24.1571	-110.399	Fishing panga	50	180	24.1566	-110.399
23/10/2020	11:08	24.1499	-110.4	Fishing panga	300	0	24.1526	-110.4
23/10/2020	11:54	24.1554	-110.393	Fishing panga	200	335	24.1571	-110.394
23/10/2020	13:53	24.1456	-110.368	Fishing panga	200	180	24.1438	-110.368
23/10/2020	14:09	24.16	-110.334	Passenger panga	50	45	24.1603	-110.333
23/10/2020	14:16	24.1671	-110.326	Touristic panga	2,000	0	24.1851	-110.326
23/10/2020	14:34	24.1737	-110.324	Touristic panga	2,000	0	24.1917	-110.324
23/10/2020	14:39	24.1787	-110.389	Touristic panga	500	215	24.175	-110.392
23/10/2020	15:42	24.2034	-110.358	Touristic panga	1,000	0	24.2124	-110.358
23/10/2020	15:47	24.2125	-110.34	Touristic panga	500	45	24.2156	-110.336
23/10/2020	15:50	24.2163	-110.331	Touristic panga	1,000	45	24.2226	-110.324
23/10/2020	15:53	24.2183	-110.322	Touristic panga	300	90	24.2183	-110.319
23/10/2020	15:57	24.2165	-110.314	Yacht	100	90	24.2165	-110.313
23/10/2020	15:57	24.2165	-110.314	Fishing panga	50	90	24.2165	-110.313
23/10/2020	16:07	24.194	-110.304	Touristic panga	2,000	270	24.194	-110.324
23/10/2020	16:10	24.1846	-110.306	Yacht	100	90	24.1846	-110.305
23/10/2020	16:10	24.1846	-110.306	Sailing boat	150	180	24.1833	-110.306
23/10/2020	16:18	24.1638	-110.322	Touristic panga	200	45	24.1651	-110.32
23/10/2020	16:18	24.1638	-110.322	Sailing boat	50	225	24.1635	-110.322
24/10/2020	11.03	24.2009	-110.34	Touristic panga	2,000	45	24.2136	-110.326
24/10/2020	11:10	24.224	-110.35	Sailing boat	3,000	45	24.243	-110.329
24/10/2020	11:15	24.237	-110.355	Touristic panga	2,000	250	24.2309	-110.374
24/10/2020	11:15	24.237	-110.355	Touristic panga	2,000	45	24.2498	-110.341
24/10/2020	11:15	24.237	-110.355	Touristic panga	2,000	40	24.2508	-110.343
24/10/2020	11:15	24.237	-110.355	Touristic panga	2,000	35	24.2518	-110.344
24/10/2020	11:15	24.237	-110.355	Touristic panga	2,000	30	24.2526	-110.345
24/10/2020	11:15	24.237	-110.355	Touristic panga	2,000	25	24.2533	-110.347
24/10/2020	11:41	24.3222	-110.382	Touristic panga	2,000	225	24.3095	-110.395
24/10/2020	11:41	24.3222	-110.382	Touristic panga	2,000	230	24.3107	-110.397
24/10/2020	11:50	24.3496	-110.39	Sailing boat	700	90	24.3496	-110.383
24/10/2020	11:59	24.3767	-110.398	Touristic panga	3,000	180	24.3497	-110.398
24/10/2020	12:05	24.3955	-110.404	Yacht	2,000	0	24.4135	-110.404
24/10/2020	12:32	24.4414	-110.422	Sailing boat	100	180	24.4405	-110.422
24/10/2020	13:35	24.4241	-110.423	Sailing boat	500	90	24.4241	-110.418
24/10/2020	13:57	24.4897	-110.431	Yacht	2,000	90	24.4897	-110.411
24/10/2020	13:59	24.4897	-110.431	Touristic panga	2,500	90	24.4897	-110.406
24/10/2020	14:25	24.5409	-110.431	Touristic panga	2,500	90	24.5409	-110.406
24/10/2020	14:29	24.5545	-110.428	Yacht	700	90	24.5545	-110.421
24/10/2020	14:31	24.5601	-110.427	Yacht	2,000	315	24.5729	-110.441
24/10/2020	14:31	24.5601	-110.427	Yacht	500	45	24.5633	-110.423
24/10/2020	14:37	24.5789	-110.421	Touristic panga	1,000	45	24.5852	-110.414
24/10/2020	14:37	24.5789	-110.421	Sailing boat	2,000	0	24.5969	-110.421
24/10/2020	14:42	24.5928	-110.412	Touristic panga	500	35	24.5965	-110.409
24/10/2020	14:42	24.5928	-110.412	Touristic panga	400	45	24.5954	-110.409
24/10/2020	14:58	24.5968	-110.383	Touristic panga	2,000	100	24.5937	-110.363
24/10/2020	15:12	24.5822	-110.358	Yacht	5,000	90	24.5822	-110.309
24/10/2020	15:41	24.5507	-110.325	Fishing panga	3,000	250	24.5414	-110.353
24/10/2020	16:03	24.5298	-110.309	Yacht	4,000	90	24.5298	-110.269
24/10/2020	16:03	24.5298	-110.309	Yacht	4,000	80	24.536	-110.27
24/10/2020	16:26	24.4946	-110.29	Touristic panga	200	90	24.4946	-110.288
24/10/2020	16:48	24.4987	-110.392	Yacht	4,000	300	24.5167	-110.426
24/10/2020	17:03	24.5034	-110.289	Yacht	400	225	24.5008	-110.292
24/10/2020	17:58	24.312	-110.342	Touristic panga	100	180	24.3111	-110.342
24/10/2020	18:02	24.2892	-110.343	Yacht	200	270	24.2892	-110.344
24/10/2020	18:02	24.2892	-110.343	Fishing panga	200	90	24.2892	-110.341
24/10/2020	18:05	24.2704	-110.341	Sailing boat	100	45	24.271	-110.34
24/10/2020	18:09	24.2526	-110.336	Yacht	100	150	24.2518	-110.335
24/10/2020	18:12	24.2322	-110.322	Yacht	100	120	24.2318	-110.322
24/10/2020	18:16	24.2162	-110.308	Sailing boat	50	90	24.2162	-110.307
24/10/2020	18:16	24.2162	-110.308	Touristic panga	50	45	24.2165	-110.307
24/10/2020	18:26	24.1741	-110.315	Touristic panga	100	90	24.1741	-110.314
24/10/2020	18:26	24.1741	-110.315	Yacht	50	140	24.1737	-110.314
24/10/2020	18:26	24.1741	-110.315	Yacht	50	120	24.1738	-110.314
30/10/2020	07:10	24.2019	-110.304	Touristic panga	50	0	24.2024	-110.304
30/10/2020	07:13	24.209	-110.304	Touristic panga	100	0	24.2099	-110.304
30/10/2020	07:19	24.2157	-110.317	Yacht	460	0	24.2198	-110.317
30/10/2020	08:18	24.228	-110.323	Touristic panga	200	135	24.2267	-110.322
30/10/2020	08:20	24.228	-110.323	Yacht	250	135	24.2264	-110.322
30/10/2020	08:23	24.228	-110.323	Yacht	50	90	24.228	-110.323
30/10/2020	08:25	24.228	-110.323	Touristic panga	200	90	24.228	-110.321
30/10/2020	08:26	24.228	-110.323	Touristic panga	200	100	24.2277	-110.321
30/10/2020	08:27	24.228	-110.323	Yacht	200	100	24.2277	-110.321
30/10/2020	08:30	24.2278	-110.319	Ferry	1500	0	24.2413	-110.319
30/10/2020	08:31	24.2279	-110.318	Touristic panga	50	0	24.2283	-110.318
30/10/2020	08:32	24.2281	-110.317	Yacht	200	135	24.2268	-110.316
30/10/2020	08:35	24.2269	-110.317	Ferry	3,000	300	24.2404	-110.343
30/10/2020	08:35	24.2269	-110.317	Ferry	3,000	290	24.2361	-110.345
30/10/2020	08:47	24.2271	-110.319	Sailing boat	200	45	24.2284	-110.318
30/10/2020	08:51	24.2271	-110.319	Sailing boat	150	270	24.2271	-110.321
30/10/2020	08:54	24.2271	-110.319	Ferry	1,000	45	24.2335	-110.312
30/10/2020	09:08	24.2222	-110.318	Touristic panga	300	0	24.2249	-110.318
30/10/2020	09:12	24.2222	-110.318	Cargo	600	180	24.2168	-110.318
30/10/2020	09:27	24.2178	-110.33	Fishing panga	300	0	24.2205	-110.33
30/10/2020	09:29	24.2166	-110.337	Touristic panga	400	225	24.214	-110.34
30/10/2020	09:31	24.2142	-110.342	Cargo	50	45	24.2145	-110.341
30/10/2020	09:31	24.2142	-110.342	Ferry	3,000	0	24.2412	-110.342
30/10/2020	09:40	24.2096	-110.362	Cargo	3,000	315	24.2287	-110.383
30/10/2020	10:10	24.191	-110.406	Touristic panga	1,000	225	24.1847	-110.413
30/10/2020	10:31	24.1855	-110.405	Touristic panga	1500	135	24.176	-110.395
30/10/2020	11:43	24.1788	-110.327	Touristic panga	500	0	24.1833	-110.327
30/10/2020	11:50	24.1663	-110.326	Passenger panga	100	180	24.1654	-110.326
30/10/2020	11:58	24.1549	-110.343	Touristic panga	400	180	24.1513	-110.343
30/10/2020	12:10	24.1431	-110.373	Touristic panga	50	90	24.1431	-110.372
30/10/2020	12:21	24.143	-110.373	Touristic panga	50	180	24.1426	-110.373
30/10/2020	13:46	24.1425	-110.379	Yacht	400	90	24.1425	-110.375
30/10/2020	13:54	24.1573	-110.338	Passenger panga	200	90	24.1573	-110.336
30/10/2020	14:22	24.1535	-110.347	Jet sky	700	225	24.149	-110.352
31/10/2020	07:10	24.186	-110.35	Fishing panga	50	240	24.1858	-110.351
31/10/2020	07:32	24.1938	-110.386	Touristic panga	4,000	45	24.2192	-110.358
31/10/2020	07:40	24.1958	-110.392	Touristic panga	5,000	0	24.2408	-110.392
31/10/2020	08:03	24.2137	-110.358	Fishing panga	1,000	90	24.2137	-110.348
31/10/2020	08:12	24.2229	-110.334	Fishing panga	200	90	24.2229	-110.332
31/10/2020	08:14	24.2223	-110.328	Ferry	300	90	24.2223	-110.325
31/10/2020	08:14	24.2223	-110.328	Ferry	300	88	24.2224	-110.325
31/10/2020	08:14	24.2223	-110.328	Ferry	5,000	340	24.2646	-110.345
31/10/2020	08:16	24.2203	-110.322	Yacht	1,000	180	24.2113	-110.322
31/10/2020	08:18	24.2179	-110.316	Fishing panga	1,000	90	24.2179	-110.306
31/10/2020	08:31	24.1892	-110.305	Yacht	70	90	24.1892	-110.304
31/10/2020	08:32	24.1865	-110.306	Touristic panga	4,000	270	24.1865	-110.345
31/10/2020	08:35	24.1783	-110.311	Touristic panga	50	45	24.1786	-110.31
31/10/2020	08:35	24.1783	-110.311	Touristic panga	2,000	270	24.1783	-110.33
31/10/2020	08:41	24.1656	-110.323	Touristic panga	100	270	24.1656	-110.324
31/10/2020	08:43	24.1627	-110.328	Touristic panga	200	45	24.164	-110.327
31/10/2020	08:48	24.158	-110.339	Passenger panga	200	135	24.1567	-110.338
31/10/2020	08:59	24.1481	-110.359	Touristic panga	300	180	24.1454	-110.359
31/10/2020	09:12	24.1488	-110.389	Fishing panga	300	0	24.1515	-110.389
31/10/2020	09:24	24.1511	-110.393	Fishing panga	300	10	24.1538	-110.392
31/10/2020	09:45	24.1295	-110.376	Jet sky	1,000	135	24.1231	-110.369
31/10/2020	09:47	24.1331	-110.371	Fishing panga	100	0	24.134	-110.371
31/10/2020	10:01	24.1569	-110.337	Touristic panga	500	90	24.1569	-110.332
31/10/2020	10:03	24.1582	-110.332	Touristic panga	150	0	24.1596	-110.332
31/10/2020	10:03	24.1582	-110.332	Jet sky	300	180	24.1555	-110.332
31/10/2020	10:06	24.1582	-110.332	Yacht	400	90	24.1582	-110.328
31/10/2020	10:12	24.1572	-110.328	Touristic panga	100	90	24.1572	-110.327
31/10/2020	10:12	24.1572	-110.328	Touristic panga	150	80	24.1574	-110.326
2020-11-12	06:57	24.2024	-110.336	Touristic panga	200	270	24.2024	-110.338
2020-11-12	07:00	24.2157	-110.336	Touristic panga	500	90	24.2157	-110.331
2020-11-12	07:02	24.2236	-110.337	Touristic panga	3,000	45	24.2427	-110.316
2020-11-12	07:15	24.2825	-110.345	Sailing boat	4,000	315	24.3079	-110.373
2020-11-12	07:20	24.303	-110.354	Sailing boat	4,000	0	24.3389	-110.354
2020-11-12	07:42	24.3837	-110.309	Fishing panga	4,000	45	24.4091	-110.281
2020-11-12	07:47	24.3946	-110.301	Ferry	10,000	45	24.4582	-110.231
2020-11-12	07:47	24.3946	-110.301	Ferry	5,000	45	24.4264	-110.266
2020-11-12	07:54	24.4167	-110.294	Ferry	5,000	45	24.4512	-110.262
2020-11-12	08:11	24.4563	-110.285	Touristic panga	1,000	90	24.4562	-110.275
2020-11-12	08:51	24.5038	-110.281	Touristic panga	6,000	270	24.5173	-110.307
2020-11-12	10:10	24.5799	-110.414	Yacht	700	135	24.5755	-110.409
2020-11-12	10:18	24.5617	-110.418	Yacht	1,000	135	24.5553	-110.411
2020-11-12	10:20	24.5577	-110.418	Touristic panga	500	45	24.5609	-110.415
2020-11-12	10:24	24.548	-110.419	Touristic panga	500	45	24.5512	-110.415
2020-11-12	10:24	24.548	-110.419	Touristic panga	500	70	24.5495	-110.414
2020-11-12	10:31	24.5314	-110.418	Touristic panga	500	45	24.5346	-110.415
2020-11-12	10:36	24.5118	-110.418	Touristic panga	500	45	24.515	-110.415
2020-11-12	10:38	24.5149	-110.418	Sailing boat	2,000	270	24.5149	-110.438
2020-11-12	10:51	24.4893	-110.417	Touristic panga	3,000	45	24.5084	-110.396
2020-11-12	10:55	24.4896	-110.417	Touristic panga	2,000	90	24.4896	-110.397
2020-11-12	10:58	24.4896	-110.417	Touristic panga	3,000	45	24.5087	-110.396
2020-11-12	11:07	24.4749	-110.412	Fishing panga	1,000	50	24.4807	-110.404
2020-11-12	11:07	24.4749	-110.412	Fishing panga	800	50	24.4795	-110.406
2020-11-12	11:10	24.4681	-110.41	Touristic panga	1,000	90	24.4681	-110.4
2020-11-12	11:14	24.4611	-110.406	Touristic panga	1,500	90	24.4611	-110.391
2020-11-12	11:20	24.4476	-110.401	Yacht	1,500	90	24.4476	-110.386
2020-11-12	11:29	24.4272	-110.4	Sailing boat	500	90	24.4271	-110.395
2020-11-12	11:29	24.4272	-110.4	Touristic panga	1,000	90	24.4271	-110.39
2020-11-12	11:29	24.4272	-110.4	Touristic panga	1,000	90	24.4271	-110.39
2020-11-12	11:31	24.4233	-110.394	Touristic panga	1,000	90	24.4233	-110.384
2020-11-12	11:39	24.4056	-110.388	Touristic panga	500	90	24.4056	-110.383
2020-11-12	11:48	24.3856	-110.381	Yacht	1,000	90	24.3856	-110.372
2020-11-12	11:48	24.3856	-110.381	Touristic panga	1,000	120	24.3811	-110.373
2020-11-12	11:54	24.3735	-110.377	Sailing boat	500	135	24.3703	-110.373
2020-11-12	11:58	24.3663	-110.373	Sailing boat	500	135	24.3631	-110.37
2020-11-12	12:03	24.3566	-110.369	Touristic panga	1,000	90	24.3566	-110.36
2020-11-12	12:03	24.3566	-110.369	Touristic panga	3,000	135	24.3376	-110.348
2020-11-12	12:08	24.3436	-110.365	Sailing boat	800	90	24.3436	-110.357
2020-11-12	12:08	24.3436	-110.365	Sailing boat	500	180	24.3391	-110.365
2020-11-12	12:08	24.3436	-110.365	Touristic panga	1,500	90	24.3436	-110.35
2020-11-12	12:11	24.3374	-110.363	Sailing boat	500	180	24.3329	-110.363
2020-11-12	12:11	24.3374	-110.363	Touristic panga	700	270	24.3374	-110.37
2020-11-12	12:13	24.3315	-110.361	Yacht	1,000	135	24.3251	-110.354
2020-11-12	12:30	24.3176	-110.357	Touristic panga	1,000	90	24.3176	-110.347
2020-11-12	12:52	24.3327	-110.342	Touristic panga	2,000	135	24.32	-110.328
2020-11-12	12:58	24.3327	-110.342	Touristic panga	2,000	135	24.32	-110.328
2020-11-12	13:01	24.3327	-110.342	Yacht	1,500	45	24.3422	-110.332
2020-11-12	13:19	24.3406	-110.33	Yacht	1,000	180	24.3316	-110.33
2020-11-12	13:19	24.3406	-110.33	Yacht	1,500	200	24.3279	-110.335
2020-11-12	13:46	24.3255	-110.34	Sailing boat	200	270	24.3255	-110.342
2020-11-12	13:46	24.3255	-110.34	Yacht	300	90	24.3255	-110.337
2020-11-12	13:46	24.3255	-110.34	Yacht	500	100	24.3247	-110.335
2020-11-12	13:49	24.3156	-110.341	Touristic panga	300	45	24.3175	-110.339
2020-11-12	13:49	24.3156	-110.341	Touristic panga	300	270	24.3156	-110.344
2020-11-12	13:49	24.3156	-110.341	Touristic panga	800	180	24.3084	-110.341
2020-11-12	13:58	24.279	-110.342	Yacht	200	0	24.2808	-110.342
2020-11-12	14:01	24.2895	-110.34	Touristic panga	150	180	24.2882	-110.34
2020-11-12	14:04	24.256	-110.337	Yacht	600	135	24.2522	-110.333
2020-11-12	14:07	24.2483	-110.331	Touristic panga	200	90	24.2483	-110.329
2020-11-12	14:07	24.2483	-110.331	Sailing boat	500	135	24.2451	-110.327
2020-11-12	14:07	24.2483	-110.331	Sailing boat	1,000	270	24.2483	-110.341
2020-11-12	14:17	24.2157	-110.306	Yacht	200	90	24.2157	-110.304
2020-11-12	14:27	24.1962	-110.304	Touristic panga	200	90	24.1962	-110.302
2020-11-12	14:30	24.1833	-110.308	Touristic panga	150	180	24.182	-110.308
2020-11-12	14:37	24.1698	-110.317	Jet sky	200	180	24.168	-110.317
2020-11-12	14:42	24.159	-110.327	Touristic panga	200	0	24.1607	-110.327
2020-11-12	14:49	24.159	-110.327	Touristic panga	150	45	24.1599	-110.326
18/11/2020	06:57	24.1876	-110.329	Fishing panga	1,000	270	24.1876	-110.339
18/11/2020	07:01	24.2029	-110.332	Touristic panga	2,000	45	24.2156	-110.318
18/11/2020	07:39	24.2273	-110.334	Touristic panga	150	150	24.2261	-110.334
18/11/2020	07:52	24.2369	-110.335	Yacht	500	45	24.2401	-110.331
18/11/2020	08:12	24.2799	-110.354	Ferry	3,000	0	24.3069	-110.354
18/11/2020	08:38	24.3559	-110.38	Yacht	3,000	0	24.3828	-110.38
18/11/2020	09:46	24.5008	-110.426	Touristic panga	500	45	24.504	-110.423
18/11/2020	14:19	24.3808	-110.656	Touristic panga	300	270	24.3808	-110.659
18/11/2020	17:02	24.1759	-110.385	Touristic panga	1,000	0	24.1849	-110.385
18/11/2020	17:21	24.1797	-110.333	Touristic panga	500	90	24.1797	-110.328
07/12/202	07:04	24.165	-110.325	Touristic panga	300	0	24.1677	-110.325
07/12/202	08:12	24.2115	-110.357	Fishing panga	200	45	24.2128	-110.356
07/12/202	08:26	24.2189	-110.334	Yacht	700	0	24.2252	-110.334
07/12/202	08:26	24.2189	-110.334	Yacht	500	90	24.2189	-110.329
07/12/202	08:30	24.2173	-110.324	Touristic panga	400	90	24.2173	-110.32
07/12/202	08:32	24.2164	-110.321	Touristic panga	700	90	24.2164	-110.314
07/12/202	08:33	24.2154	-110.318	Sailing boat	500	90	24.2154	-110.313
07/12/202	08:36	24.2152	-110.316	Sailing boat	200	90	24.2152	-110.314
07/12/202	08:36	24.2152	-110.316	Touristic panga	250	90	24.2152	-110.313
07/12/202	08:41	24.2148	-110.305	Fishing panga	200	120	24.2139	-110.304
07/12/202	08:41	24.2148	-110.305	Yacht	200	135	24.2135	-110.304
07/12/202	08:41	24.2148	-110.305	Touristic panga	250	135	24.2132	-110.304
07/12/202	08:50	24.1962	-110.305	Touristic panga	50	180	24.1958	-110.305
07/12/202	08:55	24.1841	-110.307	Yacht	100	180	24.1832	-110.307
07/12/202	09:00	24.1748	-110.314	Touristic panga	300	270	24.1748	-110.317
07/12/202	09:00	24.1748	-110.314	Touristic panga	300	260	24.1743	-110.317
07/12/202	09:26	24.1583	-110.337	Touristic panga	50	45	24.1587	-110.336
07/12/202	09:28	24.1498	-110.354	Passenger panga	2500	235	24.1369	-110.375
07/12/202	09:33	24.1467	-110.362	Touristic panga	50	45	24.147	-110.361
07/12/202	10:14	24.1506	-110.355	Touristic panga	200	90	24.1506	-110.353
07/12/202	10:14	24.1506	-110.355	Touristic panga	250	120	24.1495	-110.353
07/12/202	10:29	24.1602	-110.337	Passenger panga	200	180	24.1584	-110.337
07/12/202	10:39	24.1635	-110.331	Passenger panga	200	180	24.1617	-110.331
07/12/202	10:44	24.1635	-110.331	Yacht	400	180	24.1599	-110.331
09/12/2020	07:14	24.2027	-110.335	Touristic panga	300	0	24.2054	-110.335
09/12/2020	07:14	24.2027	-110.335	Touristic panga	500	30	24.2066	-110.332
09/12/2020	07:14	24.2027	-110.335	Touristic panga	500	150	24.1988	-110.332
09/12/2020	07:21	24.2223	-110.338	Sailing boat	1000	45	24.2287	-110.332
09/12/2020	07:35	24.2634	-110.35	Touristic panga	1000	90	24.2634	-110.34
09/12/2020	07:42	24.2824	-110.352	Fishing panga	400	315	24.285	-110.355
09/12/2020	07:53	24.316	-110.346	Yacht	700	45	24.3205	-110.341
09/12/2020	07:53	24.316	-110.346	Sailing boat	1500	300	24.3228	-110.359
09/12/2020	07:53	24.316	-110.346	Yacht	700	225	24.3116	-110.351
09/12/2020	08:23	24.3791	-110.345	Ferry	1800	180	24.3629	-110.345
09/12/2020	08:32	24.3943	-110.358	Ferry	3000	80	24.399	-110.329
09/12/2020	09:45	24.5139	-110.427	Touristic panga	2000	0	24.5319	-110.427
09/12/2020	12:36	24.4788	-110.265	Ferry	4000	0	24.5147	-110.265
09/12/2020	12:36	24.4788	-110.265	Ferry	5000	45	24.5106	-110.231
09/12/2020	13:23	24.3904	-110.29	Touristic panga	500	180	24.3859	-110.29
09/12/2020	14:07	24.3198	-110.345	Touristic panga	600	120	24.3171	-110.34
09/12/2020	14:11	24.3135	-110.347	Yacht	3000	200	24.2882	-110.357
09/12/2020	14:23	24.2885	-110.348	Touristic panga	500	120	24.2862	-110.343
09/12/2020	14:30	24.2677	-110.343	Sailing boat	500	180	24.2632	-110.343
09/12/2020	14:30	24.2677	-110.343	Touristic panga	500	90	24.2677	-110.338
09/12/2020	14:33	24.2596	-110.34	Sailing boat	700	270	24.2596	-110.347
09/12/2020	14:33	24.2596	-110.34	Fishing panga	3000	240	24.2461	-110.366
09/12/2020	14:33	24.2596	-110.34	Touristic panga	400	45	24.2622	-110.337
09/12/2020	14:33	24.2596	-110.34	Touristic panga	400	45	24.2622	-110.337
09/12/2020	14:38	24.246	-110.332	Sailing boat	700	270	24.246	-110.339
09/12/2020	14:44	24.2316	-110.324	Touristic panga	1000	45	24.2379	-110.317
09/12/2020	14:58	24.1991	-110.304	Touristic panga	400	180	24.1955	-110.304
09/12/2020	14:58	24.1991	-110.304	Touristic panga	200	90	24.1991	-110.302
29/03/2021	08:35:00	24.227	-110.347	Ferry	430	270	24.227	-110.351
29/03/2021	08:52:00	24.2268	-110.347	Touristic panga	100	270	24.2268	-110.348
29/03/2021	08:53:00	24.2268	-110.347	Fishing panga	300	270	24.2268	-110.35
29/03/2021	08:56:00	24.2268	-110.347	Yacht	300	90	24.2268	-110.344
29/03/2021	08:56:00	24.2268	-110.347	Touristic panga	500	90	24.2268	-110.342
29/03/2021	08:56:00	24.2268	-110.347	Touristic panga	500	0	24.2313	-110.347
29/03/2021	08:57:00	24.2268	-110.347	Ferry	400	270	24.2268	-110.351
29/03/2021	09:00:00	24.2268	-110.347	Ferry	1000	270	24.2268	-110.357
29/03/2021	09:00:00	24.2268	-110.347	Ferry	1500	270	24.2268	-110.362
29/03/2021	09:00:00	24.2268	-110.347	Touristic panga	800	90	24.2268	-110.339
29/03/2021	09:08:00	24.2338	-110.341	Touristic panga	300	0	24.2365	-110.341
29/03/2021	09:15:00	24.2385	-110.381	Touristic panga	200	90	24.2385	-110.379
29/03/2021	09:18:00	24.2377	-110.334	Touristic panga	200	90	24.2377	-110.332
29/03/2021	09:18:00	24.2377	-110.344	Touristic panga	800	90	24.2377	-110.337
29/03/2021	09:21:00	24.2377	-110.344	Touristic panga	1000	270	24.2377	-110.354
29/03/2021	09:23:00	24.2377	-110.344	Touristic panga	400	100	24.2371	-110.341
29/03/2021	09:23:00	24.2377	-110.344	Touristic panga	500	120	24.2355	-110.34
29/03/2021	09:29:00	24.2409	-110.333	Yacht	200	180	24.2391	-110.333
29/03/2021	09:30:00	24.2409	-110.333	Touristic panga	50	270	24.2409	-110.333
29/03/2021	09:33:00	24.2447	-110.339	Ferry	200	270	24.2447	-110.341
29/03/2021	09:33:00	24.2447	-110.339	Ferry	700	300	24.2478	-110.345
29/03/2021	09:57:00	24.2786	-110.363	Cargo	500	45	24.2818	-110.36
29/03/2021	10:14:00	24.2981	-110.362	Yacht	700	45	24.3025	-110.357
29/03/2021	10:18:00	24.3028	-110.36	Touristic panga	1000	45	24.3091	-110.353
29/03/2021	10:21:00	24.3059	-110.359	Touristic panga	500	90	24.3059	-110.354
29/03/2021	10:31:00	24.3107	-110.346	Sailing boat	500	0	24.3152	-110.346
29/03/2021	10:31:00	24.3107	-110.346	Sailing boat	500	10	24.3151	-110.345
29/03/2021	10:42:00	24.304	-110.344	Touristic panga	20	270	24.304	-110.344
29/03/2021	10:44:00	24.304	-110.344	Sailing boat	300	280	24.3044	-110.347
29/03/2021	10:44:00	24.304	-110.344	Sailing boat	200	300	24.3048	-110.345
29/03/2021	10:44:00	24.304	-110.344	Touristic panga	300	290	24.3049	-110.347
29/03/2021	10:44:00	24.304	-110.344	Touristic panga	300	310	24.3057	-110.346
29/03/2021	10:47:00	24.304	-110.344	Touristic panga	50	180	24.3035	-110.344
29/03/2021	10:59:00	24.2907	-110.343	Touristic panga	300	90	24.2907	-110.34
29/03/2021	11:00:00	24.2867	-110.343	Touristic panga	200	100	24.2864	-110.341
29/03/2021	11:00:00	24.2867	-110.343	Touristic panga	200	90	24.2867	-110.341
29/03/2021	11:06:00	24.2631	-110.341	Yacht	400	100	24.2625	-110.337
29/03/2021	11:08:00	24.2574	-110.34	Touristic panga	100	90	24.2574	-110.339
29/03/2021	11:08:00	24.2574	-110.34	Sailing boat	50	90	24.2574	-110.34
29/03/2021	11:08:00	24.2574	-110.34	Touristic panga	200	120	24.2565	-110.338
29/03/2021	11:10:00	24.2419	-110.338	Yacht	50	160	24.2414	-110.338
29/03/2021	11:12:00	24.2382	-110.335	Touristic panga	300	90	24.2382	-110.333
29/03/2021	11:12:00	24.2382	-110.335	Touristic panga	700	90	24.2382	-110.329
29/03/2021	11:12:00	24.2382	-110.335	Sailing boat	400	90	24.2382	-110.332
29/03/2021	11:16:00	24.2214	-110.322	Touristic panga	200	50	24.2226	-110.32
29/03/2021	11:30	24.172	-110.324	Touristic panga	50	270	24.172	-110.324
29/03/2021	11:34	24.172	-110.324	Touristic panga	50	0	24.1724	-110.324
16/04/2021	10:50	24.1624	-110.327	Passenger panga	100	270	24.1624	-110.328
16/04/2021	11:07	24.2241	-110.555	Passenger panga	200	300	24.225	-110.557
16/04/2021	11:07	24.2241	-110.555	Passenger panga	200	320	24.2255	-110.556
16/04/2021	11:28	24.3119	-110.361	Sailing boat	300	270	24.3119	-110.364
16/04/2021	11:36	24.3378	-110.367	Fishing panga	500	300	24.34	-110.371
16/04/2021	11:53	24.3908	-110.38	Sailing boat	1000	45	24.3972	-110.373
16/04/2021	11:56	24.3951	-110.382	Touristic panga	1000	45	24.4015	-110.375
16/04/2021	11:56	24.3951	-110.382	Touristic panga	1000	48	24.4011	-110.375
16/04/2021	11:56	24.3951	-110.382	Touristic panga	1000	50	24.4009	-110.375
16/04/2021	11:56	24.3951	-110.382	Touristic panga	1000	52	24.4007	-110.375
16/04/2021	12:16	24.4251	-110.393	Sailing boat	2000	40	24.4389	-110.38
16/04/2021	12:16	24.4251	-110.393	Touristic panga	2000	40	24.4389	-110.38
16/04/2021	12:18	24.4513	-110.402	Touristic panga	2000	15	24.4687	-110.397
16/04/2021	12:27	24.4764	-110.412	Touristic panga	2000	35	24.4911	-110.4
16/04/2021	12:31	24.4885	-110.415	Touristic panga	2000	35	24.5032	-110.403
16/04/2021	12:31	24.4885	-110.415	Sailing boat	2000	35	24.5032	-110.403
16/04/2021	13:13	24.5327	-110.339	Fishing panga	2000	12	24.5503	-110.335
16/04/2021	13:36	24.5117	-110.304	Touristic panga	500	0	24.5162	-110.304
16/04/2021	13:36	24.5117	-110.304	Touristic panga	500	0	24.5162	-110.304
16/04/2021	14:02	24.5052	-110.297	Touristic panga	300	225	24.5033	-110.299
16/04/2021	14:44	24.5043	-110.302	Touristic panga	500	270	24.5043	-110.307
16/04/2021	15:03	24.5138	-110.311	Yacht	500	335	24.5179	-110.313
16/04/2021	15:03	24.5138	-110.311	Touristic panga	300	108	24.513	-110.309
16/04/2021	15:52	24.6012	-110.396	Touristic panga	400	180	24.5976	-110.396
16/04/2021	16:08	24.5746	-110.424	Yacht	700	90	24.5746	-110.417
16/04/2021	16:08	24.5746	-110.424	Touristic panga	1000	90	24.5746	-110.414
16/04/2021	16:12	24.5592	-110.429	Touristic panga	2000	90	24.5592	-110.41
16/04/2021	16:16	24.5533	-110.437	Touristic panga	2000	90	24.5533	-110.417
16/04/2021	16:31	24.5572	-110.439	Touristic panga	2000	0	24.5751	-110.439
16/04/2021	17:07	24.4734	-110.432	Touristic panga	4000	90	24.4734	-110.392
25/04/2021	09:57	24.1792	-110.31	Touristic panga	2000	270	24.1792	-110.33
25/04/2021	10:07	24.2159	-110.307	Touristic panga	50	45	24.2162	-110.307
25/04/2021	10:09	24.2173	-110.312	Touristic panga	100	0	24.2182	-110.312
25/04/2021	10:09	24.222	-110.317	Yacht	100	170	24.2211	-110.317
25/04/2021	10:16	24.2254	-110.335	Touristic panga	50	270	24.2254	-110.336
25/04/2021	10:29	24.2281	-110.334	Touristic panga	100	0	24.229	-110.334
25/04/2021	10:38	24.2377	-110.334	Touristic panga	200	45	24.239	-110.333
25/04/2021	10:38	24.2377	-110.334	Touristic panga	500	180	24.2332	-110.334
25/04/2021	10:38	24.2377	-110.334	Touristic panga	300	0	24.2404	-110.334
25/04/2021	10:40	24.2532	-110.334	Sailing boat	500	60	24.2554	-110.33
25/04/2021	12:52	24.3614	-110.176	Touristic panga	6000	180	24.3074	-110.176
25/04/2021	12:57	24.3614	-110.176	Sailing boat	5000	180	24.3164	-110.176
25/04/2021	14:24	24.3372	-110.341	Touristic panga	1000	180	24.3282	-110.341
25/04/2021	14:24	24.3372	-110.341	Touristic panga	1500	270	24.3372	-110.355
25/04/2021	14:24	24.3372	-110.341	Yacht	1000	150	24.3295	-110.336
25/04/2021	14:24	24.3372	-110.341	Touristic panga	1000	200	24.3288	-110.344
25/04/2021	15:03	24.3335	-110.34	Ferry	2000	300	24.3425	-110.357
25/04/2021	15:03	24.3335	-110.34	Sailing boat	500	90	24.3335	-110.335
25/04/2021	15:11	24.3026	-110.343	Jet sky	500	180	24.2981	-110.343
25/04/2021	15:11	24.3026	-110.343	Touristic panga	500	100	24.3018	-110.338
25/04/2021	15:21	24.2801	-110.341	Touristic panga	100	90	24.2801	-110.34
25/04/2021	15:21	24.2801	-110.341	Touristic panga	500	140	24.2767	-110.338
25/04/2021	15:24	24.2798	-110.341	Touristic panga	500	270	24.2798	-110.346
25/04/2021	15:37	24.2874	-110.342	Touristic panga	300	0	24.2901	-110.342
25/04/2021	15:56	24.2902	-110.341	Touristic panga	200	270	24.2902	-110.343
25/04/2021	15:56	24.2902	-110.341	Touristic panga	400	270	24.2902	-110.345
25/04/2021	15:56	24.2902	-110.341	Touristic panga	500	90	24.2902	-110.337
25/04/2021	15:56	24.2902	-110.341	Touristic panga	500	90	24.2902	-110.337
25/04/2021	16:09	24.2419	-110.328	Yacht	200	90	24.2419	-110.326
25/04/2021	16:09	24.2419	-110.328	Sailing boat	600	270	24.2419	-110.334
25/04/2021	16:09	24.2419	-110.328	Touristic panga	800	280	24.2431	-110.336
25/04/2021	16:38	24.1714	-110.316	Touristic panga	500	180	24.1669	-110.316
25/04/2021	16:50	24.1709	-110.317	Touristic panga	500	200	24.1667	-110.319
25/04/2021	16:53	24.1709	-110.317	Touristic panga	500	270	24.1709	-110.322
25/04/2021	16:53	24.1709	-110.317	Touristic panga	200	90	24.1709	-110.315
25/04/2021	16:56	24.1672	-110.32	Touristic panga	100	270	24.1672	-110.321
25/04/2021	17:10	24.1682	-110.32	Touristic panga	200	180	24.1664	-110.32
2021-05-06	10:37	24.1626	-110.326	Sailing boat	50	270	24.1626	-110.327
2021-05-06	10:37	24.1626	-110.326	Yacht	100	45	24.1632	-110.325
2021-05-06	10:50	24.204	-110.337	Touristic panga	200	270	24.204	-110.339
2021-05-06	10:54	24.2289	-110.339	Cargo	500	45	24.2321	-110.335
2021-05-06	11:07	24.2796	-110.349	Yacht	300	270	24.2796	-110.352
2021-05-06	11:20	24.3219	-110.355	Touristic panga	200	270	24.3219	-110.357
2021-05-06	11:49	24.3878	-110.38	Touristic panga	1000	45	24.3941	-110.373
2021-05-06	11:49	24.3898	-110.38	Touristic panga	1000	45	24.3961	-110.373
2021-05-06	11:49	24.3898	-110.38	Yacht	2000	90	24.3898	-110.361
2021-05-06	11:49	24.3898	-110.38	Yacht	2000	90	24.3898	-110.361
2021-05-06	12:11	24.4411	-110.397	Touristic panga	2000	90	24.4411	-110.378
2021-05-06	12:34	24.4757	-110.426	Yacht	1000	90	24.4757	-110.416
2021-05-06	12:52	24.4757	-110.426	Touristic panga	1000	90	24.4757	-110.416
2021-05-06	13:20	24.4791	-110.423	Touristic panga	2000	90	24.4791	-110.403
2021-05-06	13:28	24.4754	-110.424	Yacht	1500	90	24.4754	-110.409
2021-05-06	13:33	24.4754	-110.424	Yacht	1000	0	24.4844	-110.424
2021-05-06	13:43	24.4693	-110.426	Yacht	200	180	24.4675	-110.426
2021-05-06	14:46	24.4642	-110.43	Sailing boat	2000	300	24.4731	-110.447
2021-05-06	15:04	24.5089	-110.421	Touristic panga	2000	90	24.5089	-110.401
2021-05-06	15:22	24.5853	-110.405	Touristic panga	250	90	24.5853	-110.402
2021-05-06	15:22	24.5853	-110.405	Yacht	2000	300	24.5943	-110.422
2021-05-06	15:22	24.5853	-110.405	Yacht	2000	320	24.5991	-110.417
2021-05-06	15:22	24.5853	-110.405	Fishing panga	2000	335	24.6016	-110.413
2021-05-06	16:41	24.5041	-110.299	Sailing boat	1000	335	24.5122	-110.303
2021-05-06	17:27	24.4429	-110.299	Touristic panga	100	270	24.4429	-110.3
2021-05-06	18:12	24.4489	-110.303	Yacht	1000	180	24.4399	-110.303
2021-05-06	18:13	24.4489	-110.303	Touristic panga	1500	180	24.4354	-110.303
2021-05-06	17:49	24.447	-110.303	Touristic panga	2000	35	24.4617	-110.291
2021-05-06	18:31	24.4185	-110.306	Sailing boat	500	30	24.4224	-110.304
2021-05-06	18:31	24.4185	-110.306	Yacht	1000	40	24.4254	-110.3
2021-05-06	18:31	24.4185	-110.306	Yacht	3000	50	24.4358	-110.283
2021-05-06	18:43	24.353	-110.329	Sailing boat	500	90	24.353	-110.324
2021-05-06	18:50	24.3209	-110.341	Yacht	400	90	24.3209	-110.337
2021-05-06	18:50	24.3209	-110.341	Touristic panga	500	90	24.3209	-110.336
2021-05-06	18:57	24.2847	-110.345	Yacht	100	0	24.2856	-110.345
2021-05-06	19:02	24.2556	-110.338	Yacht	400	90	24.2556	-110.334
2021-05-06	19:11	24.1768	-110.313	Yacht	50	180	24.1764	-110.313
14/05/2021	09:48	24.2532	-110.356	Sailing boat	1000	90	24.2531	-110.346
14/05/2021	09:48	24.2532	-110.356	Touristic panga	1000	45	24.2595	-110.349
14/05/2021	09:48	24.2532	-110.356	Touristic panga	2000	30	24.2687	-110.346
14/05/2021	09:48	24.2532	-110.356	Touristic panga	2500	10	24.2753	-110.352
14/05/2021	09:51	24.2559	-110.348	Touristic panga	500	100	24.2551	-110.343
14/05/2021	09:51	24.2559	-110.348	Touristic panga	1000	120	24.2514	-110.339
14/05/2021	09:51	24.2559	-110.348	Yacht	1500	140	24.2456	-110.338
14/05/2021	09:54	24.2553	-110.341	Yacht	700	90	24.2553	-110.334
14/05/2021	09:56	24.2542	-110.337	Sailing boat	300	120	24.2528	-110.335
14/05/2021	09:56	24.2542	-110.337	Sailing boat	800	180	24.247	-110.337
14/05/2021	09:56	24.2542	-110.337	Sailing boat	1500	150	24.2425	-110.33
14/05/2021	10:08	24.2539	-110.333	Touristic panga	700	270	24.2539	-110.34
14/05/2021	10:12	24.2539	-110.333	Touristic panga	1000	180	24.2449	-110.333
14/05/2021	10:18	24.2466	-110.33	Touristic panga	50	90	24.2466	-110.33
14/05/2021	10:18	24.2466	-110.33	Touristic panga	50	80	24.2467	-110.33
14/05/2021	10:18	24.2466	-110.33	Fishing panga	200	90	24.2466	-110.328
14/05/2021	10:18	24.2466	-110.33	Fishing panga	200	80	24.2469	-110.328
14/05/2021	10:24	24.2279	-110.322	Touristic panga	100	90	24.2279	-110.321
14/05/2021	10:25	24.2262	-110.319	Fishing panga	2000	180	24.2082	-110.319
14/05/2021	10:25	24.2262	-110.319	Yacht	300	90	24.2262	-110.316
14/05/2021	10:28	24.2194	-110.315	Fishing panga	2000	250	24.2132	-110.333
14/05/2021	10:28	24.2194	-110.315	Fishing panga	3000	260	24.2147	-110.344
14/05/2021	10:30	24.2162	-110.31	Yacht	200	45	24.2175	-110.309
14/05/2021	10:31	24.2145	-110.305	Yacht	200	45	24.2158	-110.304
14/05/2021	10:33	24.2107	-110.304	Yacht	100	90	24.2107	-110.303
14/05/2021	10:38	24.1959	-110.304	Fishing panga	3000	250	24.1867	-110.332
14/05/2021	10:38	24.1959	-110.304	Fishing panga	3000	260	24.1912	-110.333
14/05/2021	10:42	24.1959	-110.304	Touristic panga	50	270	24.1959	-110.305
14/05/2021	10:45	24.1959	-110.304	Touristic panga	700	270	24.1959	-110.311
14/05/2021	10:45	24.1959	-110.304	Touristic panga	700	240	24.1928	-110.31
14/05/2021	10:51	24.1959	-110.304	Touristic panga	500	200	24.1917	-110.306
14/05/2021	10:54	24.1652	-110.322	Touristic panga	500	270	24.1652	-110.327
14/05/2021	10:54	24.1652	-110.322	Touristic panga	200	180	24.1634	-110.322
14/05/2021	11:01	24.1609	-110.329	Touristic panga	50	270	24.1609	-110.329
14/05/2021	11:01	24.1609	-110.329	Touristic panga	100	150	24.1602	-110.328
14/05/2021	11:01	24.1609	-110.329	Touristic panga	200	180	24.1592	-110.329
14/05/2021	11:54	24.1612	-110.331	Touristic panga	300	180	24.1585	-110.331
14/05/2021	12:11	24.1623	-110.322	Touristic panga	100	45	24.163	-110.322
14/05/2021	12:16	24.1648	-110.321	Touristic panga	300	290	24.1657	-110.324
14/05/2021	12:38	24.1763	-110.313	Sailing boat	200	150	24.1748	-110.312
14/05/2021	12:45	24.1824	-110.308	Sailing boat	100	60	24.1828	-110.307
14/05/2021	13:04	24.1813	-110.308	Yacht	200	240	24.1805	-110.31
14/05/2021	13:43	24.1644	-110.321	Touristic panga	200	280	24.1647	-110.323
14/05/2021	14:06	24.1679	-110.319	Touristic panga	200	270	24.1679	-110.321
14/05/2021	14:13	24.1562	-110.339	Touristic panga	50	270	24.1562	-110.34
14/05/2021	14:18	24.1471	-110.361	Fishing panga	100	0	24.148	-110.361
14/05/2021	14:20	24.1446	-110.368	Fishing panga	300	270	24.1446	-110.371
16/05/2021	09:43	24.2162	-110.31	Sailing boat	50	38	24.2166	-110.31
16/05/2021	09:48	24.2264	-110.322	Yacht	1000	90	24.2263	-110.312
16/05/2021	09:55	24.2483	-110.338	Sailing boat	500	85	24.2487	-110.333
16/05/2021	09:55	24.2483	-110.338	Yacht	500	33	24.2521	-110.335
16/05/2021	10:00	24.2574	-110.34	Cargo	100	101	24.2573	-110.339
16/05/2021	10:01	24.2627	-110.34	Yacht	500	180	24.2582	-110.34
16/05/2021	10:01	24.2627	-110.34	Touristic panga	100	3	24.2636	-110.34
16/05/2021	10:19	24.3067	-110.356	Sailing boat	2000	85	24.3083	-110.337
16/05/2021	10:19	24.3067	-110.356	Sailing boat	3000	40	24.3274	-110.337
16/05/2021	10:28	24.3213	-110.341	Yacht	200	45	24.3226	-110.339
16/05/2021	11:38	24.3592	-110.358	Yacht	300	30	24.3615	-110.357
16/05/2021	11:38	24.3592	-110.358	Yacht	1500	30	24.3709	-110.351
16/05/2021	11:40	24.3671	-110.362	Fishing panga	1000	33	24.3746	-110.357
16/05/2021	11:40	24.3671	-110.362	Yacht	1000	85	24.3679	-110.352
16/05/2021	11:40	24.3671	-110.362	Touristic panga	1000	33	24.3746	-110.357
16/05/2021	11:56	24.4076	-110.382	Yacht	500	90	24.4076	-110.377
16/05/2021	11:56	24.4076	-110.382	Touristic panga	700	110	24.4055	-110.376
16/05/2021	12:20	24.4673	-110.408	Sailing boat	3000	270	24.4673	-110.438
16/05/2021	12:30	24.4828	-110.414	Touristic panga	1000	0	24.4918	-110.414
16/05/2021	12:43	24.5097	-110.423	Touristic panga	2000	0	24.5277	-110.423
16/05/2021	12:43	24.5097	-110.423	Touristic panga	2500	45	24.5256	-110.406
16/05/2021	13:10	24.5819	-110.421	Touristic panga	1000	45	24.5883	-110.414
16/05/2021	13:10	24.5819	-110.421	Touristic panga	1000	45	24.5883	-110.414
16/05/2021	14:05	24.5489	-110.323	Touristic panga	4000	180	24.513	-110.323
16/05/2021	14:13	24.52	-110.303	Touristic panga	2500	300	24.5313	-110.324
16/05/2021	14:41	24.5311	-110.291	Touristic panga	2000	0	24.5491	-110.291
16/05/2021	14:58	24.5237	-110.293	Yacht	1500	40	24.534	-110.283
16/05/2021	15:04	24.5237	-110.293	Touristic panga	3000	0	24.5507	-110.293
16/05/2021	15:43	24.4418	-110.291	Touristic panga	200	0	24.4436	-110.291
16/05/2021	15:57	24.3874	-110.314	Touristic panga	500	100	24.3866	-110.31
16/05/2021	16:04	24.3618	-110.325	Touristic panga	1000	180	24.3528	-110.325
16/05/2021	16:04	24.3618	-110.325	Sailing boat	1000	270	24.3618	-110.335
16/05/2021	16:04	24.3618	-110.325	Yacht	2000	300	24.3708	-110.342
16/05/2021	16:35	24.2159	-110.306	Touristic panga	500	135	24.2127	-110.302
16/05/2021	16:35	24.2159	-110.306	Yacht	700	150	24.2104	-110.302
16/05/2021	16:35	24.2159	-110.306	Yacht	700	270	24.2159	-110.313
16/05/2021	16:35	24.2159	-110.306	Touristic panga	3000	270	24.2159	-110.335
16/05/2021	16:35	24.2159	-110.306	Touristic panga	4000	270	24.2159	-110.345
16/05/2021	16:43	24.1944	-110.305	Touristic panga	200	180	24.1926	-110.305
16/05/2021	17:05	24.1843	-110.307	Touristic panga	100	150	24.1836	-110.306
16/05/2021	17:09	24.1843	-110.307	Yacht	200	100	24.184	-110.305
16/05/2021	17:12	24.1843	-110.307	Yacht	50	150	24.184	-110.307
16/05/2021	17:16	24.1843	-110.307	Touristic panga	50	150	24.184	-110.307
16/05/2021	17:29	24.1782	-110.312	Fishing panga	100	270	24.1782	-110.313
16/05/2021	17:30	24.1782	-110.312	Yacht	200	180	24.1764	-110.312
16/05/2021	17:33	24.1782	-110.312	Fishing panga	150	270	24.1782	-110.313
16/05/2021	17:38	24.1782	-110.309	Touristic panga	200	180	24.1764	-110.309
16/05/2021	17:40	24.1782	-110.309	Touristic panga	300	180	24.1755	-110.309
16/05/2021	17:41	24.1782	-110.309	Yacht	200	180	24.1764	-110.309
16/05/2021	17:59	24.1808	-110.309	Jet sky	300	180	24.1781	-110.309
16/05/2021	18:11	24.1808	-110.309	Touristic panga	500	180	24.1763	-110.309
16/05/2021	18:13	24.1808	-110.309	Touristic panga	500	300	24.183	-110.313
16/05/2021	18:48	24.1677	-110.326	Touristic panga	300	180	24.165	-110.326
16/05/2021	18:53	24.1677	-110.326	Yacht	300	90	24.1677	-110.324
16/05/2021	17:53	24.1786	-110.311	Touristic panga	100	180	24.1777	-110.311
24/05/2021	06:44	24.1596	-110.327	Fishing panga	100	45	24.1602	-110.327
24/05/2021	06:55	24.196	-110.348	Touristic panga	5000	270	24.196	-110.397
24/05/2021	07:09	24.2546	-110.355	Ferry	1000	90	24.2546	-110.345
24/05/2021	07:23	24.3119	-110.366	Yacht	2000	335	24.3282	-110.375
24/05/2021	07:38	24.3602	-110.375	Ferry	5000	335	24.4009	-110.396
24/05/2021	07:57	24.4213	-110.388	Touristic panga	3000	120	24.4078	-110.363
24/05/2021	07:57	24.4213	-110.388	Sailing boat	3000	90	24.4213	-110.359
24/05/2021	08:01	24.4372	-110.393	Sailing boat	2000	90	24.4372	-110.374
24/05/2021	08:18	24.4882	-110.412	Touristic panga	1500	270	24.4882	-110.426
24/05/2021	09:20	24.5753	-110.362	Touristic panga	2100	180	24.5564	-110.362
24/05/2021	10:23	24.4318	-110.384	Yacht	700	90	24.4318	-110.377
24/05/2021	10:23	24.4318	-110.384	Touristic panga	700	100	24.4307	-110.378
24/05/2021	10:23	24.4318	-110.384	Touristic panga	1000	180	24.4228	-110.384
24/05/2021	10:36	24.4435	-110.393	Touristic panga	700	100	24.4424	-110.386
24/05/2021	10:46	24.42	-110.377	Touristic panga	2000	90	24.42	-110.357
24/05/2021	10:48	24.4135	-110.372	Yacht	2000	120	24.4045	-110.355
24/05/2021	10:48	24.4135	-110.372	Yacht	2500	90	24.4135	-110.352
24/05/2021	10:56	24.3885	-110.36	Touristic panga	1000	180	24.3795	-110.36
24/05/2021	10:56	24.3885	-110.36	Touristic panga	1500	200	24.3758	-110.365
24/05/2021	11:01	24.3717	-110.354	Touristic panga	500	270	24.3717	-110.359
24/05/2021	11:07	24.349	-11.3494	Touristic panga	700	300	24.3522	-110.355
24/05/2021	11:07	24.349	-110.349	Yacht	700	270	24.349	-110.356
24/05/2021	11:12	24.3392	-110.347	Touristic panga	2000	150	24.3236	-110.337
24/05/2021	11:15	24.3392	-110.347	Yacht	2500	180	24.3167	-110.347
24/05/2021	11:17	24.3334	-110.346	Sailing boat	1000	270	24.3334	-110.356
24/05/2021	11:19	24.3253	-110.345	Yacht	500	270	24.3253	-110.35
24/05/2021	11:26	24.3046	-110.343	Fishing panga	300	340	24.3072	-110.344
24/05/2021	11:26	24.3046	-110.343	Fishing panga	300	335	24.3071	-110.344
24/05/2021	11:27	24.299	-110.343	Touristic panga	500	270	24.299	-110.348
24/05/2021	11:27	24.299	-110.343	Touristic panga	500	270	24.299	-110.348
24/05/2021	11:27	24.299	-110.343	Touristic panga	500	270	24.299	-110.348
24/05/2021	11:51	24.2654	-110.343	Yacht	200	180	24.2636	-110.343
24/05/2021	11:52	24.2654	-110.343	Yacht	300	90	24.2654	-110.34
24/05/2021	11:53	24.2654	-110.343	Yacht	100	270	24.2654	-110.344
24/05/2021	12:13	24.257	-110.344	Sailing boat	1000	270	24.257	-110.354
24/05/2021	12:19	24.2405	-110.331	Yacht	500	120	24.2383	-110.327
24/05/2021	12:22	24.2313	-110.329	Touristic panga	500	270	24.2313	-110.334
24/05/2021	12:22	24.2313	-110.329	Touristic panga	1500	90	24.2313	-110.314
24/05/2021	12:35	24.1811	-110.326	Touristic panga	450	180	24.1771	-110.326
29/05/2021	08:35	24.1667	-110.324	Touristic panga	300	90	24.1667	-110.321
29/05/2021	08:35	24.1667	-110.324	Touristic panga	350	100	24.1662	-110.321
29/05/2021	08:35	24.1667	-110.324	Touristic panga	300	120	24.1654	-110.322
29/05/2021	08:38	24.1755	-110.323	Touristic panga	50	270	24.1755	-110.324
29/05/2021	08:56	24.1877	-110.317	Touristic panga	300	270	24.1877	-110.32
29/05/2021	09:11	24.1882	-110.314	Touristic panga	1000	270	24.1882	-110.323
29/05/2021	09:13	24.1882	-110.314	Touristic panga	1000	270	24.1882	-110.323
29/05/2021	09:22	24.1803	-110.309	Yacht	200	180	24.1785	-110.309
29/05/2021	09:24	24.1787	-110.31	Sailing boat	100	180	24.1778	-110.31
29/05/2021	09:24	24.1787	-110.31	Touristic panga	200	180	24.1769	-110.31
29/05/2021	09:28	24.1771	-110.313	Touristic panga	700	270	24.1771	-110.32
29/05/2021	09:31	24.1755	-110.314	Touristic panga	500	180	24.171	-110.314
29/05/2021	09:33	24.1734	-110.315	Sailing boat	100	180	24.1725	-110.315
29/05/2021	09:41	24.1714	-110.316	Touristic panga	700	270	24.1714	-110.323
29/05/2021	09:42	24.1714	-110.316	Touristic panga	800	270	24.1714	-110.324
29/05/2021	09:42	24.1714	-110.316	Touristic panga	800	250	24.169	-110.324
29/05/2021	09:44	24.1674	-110.32	Touristic panga	200	180	24.1656	-110.32
29/05/2021	09:50	24.1635	-110.326	Touristic panga	300	0	24.1662	-110.326
29/05/2021	09:50	24.1635	-110.326	Touristic panga	300	0	24.1662	-110.326
29/05/2021	09:51	24.1627	-110.327	Touristic panga	200	270	24.1627	-110.329
29/05/2021	09:51	24.1627	-110.327	Touristic panga	200	280	24.163	-110.329
29/05/2021	09:54	24.1611	-110.33	Touristic panga	200	180	24.1593	-110.33
29/05/2021	10:08	24.257	-110.337	Touristic panga	700	120	24.2538	-110.332
29/05/2021	10:09	24.257	-110.337	Touristic panga	800	180	24.2498	-110.337
29/05/2021	10:28	24.1524	-110.342	Touristic panga	300	270	24.1524	-110.345
29/05/2021	11:03	24.2161	-110.362	Touristic panga	1000	240	24.2116	-110.371
29/05/2021	11:05	24.2208	-110.369	Yacht	200	0	24.2226	-110.369
29/05/2021	13:49	24.3751	-110.549	Touristic panga	3000	270	24.3751	-110.579
29/05/2021	15:10	24.5316	-110.466	Sailing boat	4000	90	24.5316	-110.426
29/05/2021	15:35	24.503	-110.4	Yacht	2000	150	24.4875	-110.39
29/05/2021	15:42	24.488	-110.395	Touristic panga	1000	90	24.488	-110.388
29/05/2021	15:53	24.467	-110.391	Touristic panga	100	90	24.467	-110.391
29/05/2021	16:00	24.4645	-110.392	Yacht	500	90	24.4645	-110.388
29/05/2021	16:11	24.4375	-110.383	Yacht	400	180	24.4339	-110.383
29/05/2021	16:16	24.4254	-110.379	Touristic panga	500	90	24.4254	-110.374
29/05/2021	16:16	24.4254	-110.379	Touristic panga	500	95	24.425	-110.374
29/05/2021	16:16	24.4254	-110.379	Touristic panga	500	100	24.4246	-110.374
29/05/2021	16:47	24.3434	-110.35	Yacht	1000	120	24.3389	-110.341
29/05/2021	16:47	24.3434	-110.35	Sailing boat	1000	180	24.3344	-110.35
29/05/2021	16:47	24.3434	-110.35	Sailing boat	1500	90	24.3434	-110.335
29/05/2021	16:47	24.3434	-110.35	Touristic panga	2000	100	24.3403	-110.33
29/05/2021	16:47	24.3434	-110.35	Touristic panga	2000	120	24.3344	-110.333
29/05/2021	16:47	24.3434	-110.35	Touristic panga	2000	150	24.3278	-110.34
29/05/2021	17:02	24.3104	-110.349	Touristic panga	500	180	24.3059	-110.349
29/05/2021	17:08	24.2933	-110.346	Touristic panga	800	90	24.2933	-110.338
29/05/2021	17:12	24.2814	-110.345	Touristic panga	200	90	24.2814	-110.343
29/05/2021	17:12	24.2814	-110.345	Yacht	400	90	24.2814	-110.341
29/05/2021	17:12	24.2814	-110.345	Touristic panga	300	270	24.2814	-110.348
29/05/2021	17:12	24.2814	-110.345	Yacht	50	90	24.2814	-110.344
29/05/2021	17:12	24.2814	-110.345	Yacht	700	90	24.2814	-110.338
29/05/2021	17:17	24.2677	-110.341	Sailing boat	200	90	24.2677	-110.339
29/05/2021	17:34	24.2308	-110.318	Yacht	300	270	24.2308	-110.321
29/05/2021	17:34	24.2308	-110.318	Touristic panga	3000	270	24.2308	-110.348
29/05/2021	17:34	24.2308	-110.318	Touristic panga	1000	180	24.2218	-110.318
29/05/2021	17:57	24.2156	-110.305	Touristic panga	100	90	24.2156	-110.304
2021-06-07	08:33	24.1586	-110.331	Touristic panga	200	270	24.1586	-110.333
2021-06-07	08:36	24.1586	-110.331	Touristic panga	500	90	24.1586	-110.327
2021-06-07	08:38	24.1586	-110.331	Passenger panga	300	270	24.1586	-110.334
2021-06-07	08:50	24.1611	-110.333	Touristic panga	100	180	24.1602	-110.333
2021-06-07	08:53	24.1611	-110.333	Touristic panga	700	90	24.1611	-110.326
2021-06-07	08:55	24.1611	-110.333	Touristic panga	500	180	24.1566	-110.333
2021-06-07	08:55	24.1611	-110.333	Touristic panga	500	180	24.1566	-110.333
2021-06-07	09:02:00	24.1645	-110.326	Touristic panga	50	0	24.1649	-110.326
2021-06-07	09:07:00	24.1645	-110.326	Touristic panga	500	45	24.1676	-110.323
2021-06-07	09:08:00	24.1645	-110.326	Touristic panga	150	270	24.1645	-110.328
2021-06-07	09:13:00	24.1645	-110.326	Touristic panga	500	180	24.16	-110.326
2021-06-07	09:19:00	24.1659	-110.321	Yacht	50	240	24.1657	-110.322
2021-06-07	09:25:00	24.1688	-110.317	Sailing boat	100	45	24.1694	-110.316
2021-06-07	09:30:00	24.1711	-110.315	Touristic panga	700	0	24.1774	-110.315
2021-06-07	09:36:00	24.1711	-110.315	Yacht	100	270	24.1711	-110.316
2021-06-07	09:43:00	24.1622	-110.329	Touristic panga	20	0	24.1624	-110.329
2021-06-07	14:21:00	24.21	-110.343	Touristic panga	500	150	24.2061	-110.34
2021-06-07	14:29:00	24.2158	-110.307	Sailing boat	50	0	24.2162	-110.307
2021-06-07	14:36:00	24.1968	-110.304	Jet sky	300	300	24.1981	-110.307
11/06/2021	07:15	24.1586	-110.326	Yacht	100	90	24.1586	-110.325
11/06/2021	07:20	24.1769	-110.311	Sailing boat	200	90	24.1769	-110.309
11/06/2021	07:22	24.1869	-110.305	Fishing panga	50	45	24.1872	-110.305
11/06/2021	07:36	24.2357	-110.325	Sailing boat	100	0	24.2366	-110.325
11/06/2021	07:36	24.2357	-110.325	Touristic panga	300	270	24.2357	-110.328
11/06/2021	07:44	24.2678	-110.34	Sailing boat	200	0	24.2696	-110.34
11/06/2021	07:48	24.2734	-110.342	Yacht	200	0	24.2752	-110.342
11/06/2021	07:52	24.2826	-110.343	Touristic panga	100	90	24.2826	-110.342
11/06/2021	07:56	24.2947	-110.344	Ferry	1500	270	24.2946	-110.358
11/06/2021	08:00	24.3104	-110.344	Yacht	100	45	24.3111	-110.343
11/06/2021	08:00	24.3104	-110.344	Touristic panga	100	45	24.3111	-110.343
11/06/2021	08:26	24.3677	-110.271	Fishing panga	500	270	24.3677	-110.275
11/06/2021	08:29	24.3683	-110.259	Yacht	100	150	24.3675	-110.259
11/06/2021	09:17	24.3854	-110.134	Ferry	5000	270	24.3854	-110.183
11/06/2021	09:21	24.3854	-110.134	Ferry	8000	0	24.4573	-110.134
11/06/2021	10:37	24.4401	-110.279	Touristic panga	200	270	24.4401	-110.281
11/06/2021	10:49	24.4156	-110.3	Touristic panga	300	270	24.4156	-110.303
11/06/2021	11:04	24.3887	-110.336	Touristic panga	1000	180	24.3797	-110.336
11/06/2021	11:04	24.3887	-110.336	Touristic panga	1000	335	24.3968	-110.34
11/06/2021	11:04	24.3887	-110.336	Yacht	1000	325	24.396	-110.341
11/06/2021	11:04	24.3887	-110.336	Touristic panga	1500	300	24.3954	-110.348
11/06/2021	11:04	24.3887	-110.336	Touristic panga	2000	335	24.4009	-110.342
11/06/2021	11:10	24.3727	-110.346	Touristic panga	1000	270	24.3727	-110.356
11/06/2021	11:10	24.3727	-110.346	Touristic panga	1500	300	24.3795	-110.358
11/06/2021	11:10	24.3727	-110.346	Touristic panga	3000	335	24.3972	-110.358
11/06/2021	11:24	24.3349	-110.353	Yacht	500	270	24.3349	-110.358
11/06/2021	11:24	24.3349	-110.353	Touristic panga	500	240	24.3326	-110.357
11/06/2021	11:24	24.3349	-110.353	Sailing boat	400	90	24.3349	-110.349
11/06/2021	11:24	24.3349	-110.353	Touristic panga	400	120	24.3331	-110.35
11/06/2021	11:30	24.3181	-110.352	Yacht	200	45	24.3193	-110.35
11/06/2021	11:30	24.3181	-110.352	Touristic panga	500	90	24.3181	-110.347
11/06/2021	11:30	24.3181	-110.352	Yacht	400	120	24.3163	-110.348
11/06/2021	11:42	24.2963	-110.348	Touristic panga	200	90	24.2963	-110.346
11/06/2021	11:42	24.2963	-110.348	Sailing boat	500	200	24.2921	-110.35
11/06/2021	11:44	24.2896	-110.348	Yacht	500	120	24.2873	-110.343
11/06/2021	11:44	24.2896	-110.348	Yacht	500	220	24.2861	-110.351
11/06/2021	12:00	24.24	-110.349	Sailing boat	1000	90	24.24	-110.339
11/06/2021	12:00	24.24	-110.349	Sailing boat	700	120	24.2369	-110.343
11/06/2021	12:00	24.24	-110.349	Sailing boat	800	150	24.2338	-110.345
11/06/2021	12:00	24.24	-110.349	Sailing boat	600	70	24.2419	-110.344
11/06/2021	12:00	24.24	-110.349	Sailing boat	1000	100	24.2385	-110.339
11/06/2021	12:36	24.1617	-110.326	Touristic panga	300	340	24.1642	-110.327
11/06/2021	12:36	24.1617	-110.326	Touristic panga	400	0	24.1653	-110.326
11/06/2021	12:38	24.1617	-110.326	Touristic panga	300	0	24.1644	-110.326
11/06/2021	12:46	24.1611	-110.328	Touristic panga	300	180	24.1584	-110.328
11/06/2021	12:46	24.1611	-110.328	Sailing boat	500	180	24.1566	-110.328
11/06/2021	12:53	24.1604	-110.328	Yacht	300	180	24.1577	-110.328
11/06/2021	12:55	24.1604	-110.328	Yacht	150	0	24.1618	-110.328
11/06/2021	12:55	24.1604	-110.328	Touristic panga	150	340	24.1617	-110.329
11/06/2021	12:59	24.1604	-110.328	Touristic panga	100	180	24.1595	-110.328
11/06/2021	13:02	24.1604	-110.328	Touristic panga	300	180	24.1577	-110.328
11/06/2021	13:12	24.1659	-110.319	Touristic panga	300	180	24.1632	-110.319
22/06/2021	10:40	24.1619	-110.322	Touristic panga	100	45	24.1625	-110.322
22/06/2021	10:50	24.2014	-110.301	Yacht	50	45	24.2017	-110.301
22/06/2021	11:00	24.2372	-110.329	Yacht	50	45	24.2375	-110.328
22/06/2021	11:10	24.2808	-110.344	Sailing boat	400	0	24.2844	-110.344
22/06/2021	11:14	24.2996	-110.345	Touristic panga	50	215	24.2992	-110.345
22/06/2021	11:19	24.3191	-110.339	Touristic panga	100	90	24.3191	-110.338
22/06/2021	11:44	24.3635	-110.259	Touristic panga	300	0	24.3661	-110.259
22/06/2021	12:34	24.3087	-110.092	Fishing panga	100	180	24.3078	-110.092
22/06/2021	13:12	24.2886	-110.143	Yacht	500	180	24.2841	-110.143
22/06/2021	13:39	24.3333	-110.216	Touristic panga	500	45	24.3365	-110.213
22/06/2021	14:12	24.3524	-110.305	Jet sky	300	180	24.3497	-110.305
22/06/2021	14:12	24.3524	-110.305	Jet sky	300	200	24.3499	-110.306
22/06/2021	14:25	24.3352	-110.336	Sailing boat	500	270	24.3352	-110.341
22/06/2021	14:25	24.3352	-110.336	Touristic panga	3000	270	24.3352	-110.366
22/06/2021	15:01	24.3025	-110.355	Ferry	500	33	24.3062	-110.353
22/06/2021	15:07	24.2961	-110.355	Touristic panga	1000	260	24.2946	-110.364
22/06/2021	15:15	24.2865	-110.354	Sailing boat	500	220	24.283	-110.357
22/06/2021	15:21	24.2617	-110.351	Yacht	700	45	24.2662	-110.346
22/06/2021	15:21	24.2617	-110.351	Touristic panga	1000	180	24.2527	-110.351
22/06/2021	15:48	24.1776	-110.324	Touristic panga	300	90	24.1776	-110.322
22/06/2021	15:54	24.1597	-110.331	Passenger panga	50	270	24.1597	-110.331
22/06/2021	15:54	24.1597	-110.331	Touristic panga	200	180	24.158	-110.331
22/06/2021	16:11	24.1574	-110.337	Touristic panga	500	180	24.1529	-110.337
22/06/2021	16:13	24.1574	-110.337	Touristic panga	300	270	24.1574	-110.34
22/06/2021	16:14	24.1574	-110.337	Touristic panga	500	180	24.1529	-110.337
22/06/2021	16:16	24.1574	-110.337	Passenger panga	200	180	24.1556	-110.337
22/06/2021	16:31	24.159	-110.327	Touristic panga	100	180	24.1581	-110.327
22/06/2021	16:36	24.1596	-110.327	Touristic panga	200	180	24.1578	-110.327
22/06/2021	16:37	24.1596	-110.327	Passenger panga	50	270	24.1596	-110.327
22/06/2021	16:37	24.1596	-110.327	Yacht	100	270	24.1596	-110.328
22/06/2021	16:44	24.1654	-110.323	Touristic panga	200	0	24.1672	-110.323
22/06/2021	16:47	24.1654	-110.323	Touristic panga	300	45	24.1673	-110.321
25/07/2021	10:46	24.1654	-110.325	Touristic panga	20	0	24.1656	-110.325
02/08/2021	11:39	24.1752	-110.323	Touristic panga	200	180	24.1735	-110.323
02/08/2021	11:59	24.2453	-110.352	Touristic panga	300	0	24.248	-110.352
02/08/2021	12:03	24.2581	-110.357	Passenger panga	200	220	24.2567	-110.358
02/08/2021	14:42	24.404	-110.444	Touristic panga	1000	90	24.404	-110.434
02/08/2021	16:09	24.3077	-110.357	Touristic panga	500	90	24.3077	-110.352
02/08/2021	16:09	24.3077	-110.348	Touristic panga	500	90	24.3077	-110.343
02/08/2021	16:14	24.2877	-110.348	Sailing boat	200	90	24.2877	-110.346
02/08/2021	16:14	24.2877	-110.34	Sailing boat	200	270	24.2877	-110.342
02/08/2021	16:18	24.2684	-110.34	Yacht	50	180	24.268	-110.34
02/08/2021	16:18	24.2684	-110.34	Yacht	200	180	24.2666	-110.34
02/08/2021	16:26	24.2291	-110.321	Touristic panga	200	90	24.2291	-110.319
02/08/2021	16:43	24.201	-110.303	Touristic panga	300	0	24.2037	-110.303
02/08/2021	16:43	24.201	-110.303	Touristic panga	300	10	24.2037	-110.303
02/08/2021	16:56	24.2009	-110.304	Yacht	200	180	24.1991	-110.304
24/08/2021	07:39	24.1576	-110.337	Touristic panga	150	0	24.159	-110.337
24/08/2021	08:24	24.1461	-110.367	Touristic panga	1000	270	24.1461	-110.347
24/08/2021	09:37	24.1397	-110.39	Touristic panga	500	240	24.1375	-110.394
24/08/2021	11:14	24.1634	-110.324	Touristic panga	100	180	24.1625	-110.324
24/08/2021	11:14	24.1634	-110.324	Touristic panga	100	190	24.1625	-110.324
24/08/2021	11:14	24.1634	-110.324	Touristic panga	200	180	24.1616	-110.324
24/08/2021	11:14	24.1634	-110.324	Touristic panga	200	190	24.1616	-110.324
24/08/2021	11:27	24.161	-110.329	Fishing panga	150	180	24.1596	-110.329
24/08/2021	11:37	24.1618	-110.329	Touristic panga	300	180	24.1591	-110.329
24/08/2021	11:40:00	24.1618	-110.329	Touristic panga	300	180	24.1591	-110.329
24/08/2021	11:41:00	24.1618	-110.329	Touristic panga	200	180	24.16	-110.329
24/08/2021	11:43:00	24.1618	-110.329	Yacht	400	180	24.1582	-110.329
24/08/2021	12:02:00	24.1666	-110.325	Touristic panga	300	0	24.1693	-110.325
24/08/2021	12:11	24.1791	-110.325	Touristic panga	400	100	24.1785	-110.321
24/08/2021	12:14	24.1791	-110.325	Touristic panga	600	0	24.1845	-110.325
24/08/2021	12:21	24.1824	-110.33	Yacht	1000	120	24.178	-110.321
24/08/2021	12:32	24.1824	-110.33	Yacht	700	130	24.1784	-110.325
24/08/2021	12:38	24.1836	-110.33	Touristic panga	500	90	24.1836	-110.325
24/08/2021	13:21	24.1871	-110.332	Touristic panga	700	90	24.1871	-110.325
24/08/2021	13:22	24.1871	-110.332	Touristic panga	500	120	24.1848	-110.328
07/09/2021	07:27	24.193	-110.305	Touristic panga	200	0	24.1948	-110.305
07/09/2021	08:15	24.2885	-110.343	Ferry	2000	0	24.3065	-110.343
07/09/2021	09:34	24.5232	-110.31	Fishing panga	1000	0	24.5322	-110.31
07/09/2021	09:34	24.5232	-110.31	Fishing panga	1500	0	24.5367	-110.31
07/09/2021	09:34	24.5232	-110.31	Fishing panga	2000	0	24.5412	-110.31
07/09/2021	09:37	24.5241	-110.31	Yacht	1500	45	24.5336	-110.3
07/09/2021	10:50	24.5982	-110.389	Touristic panga	500	270	24.5241	-110.315
07/09/2021	10:56	24.5965	-110.398	Touristic panga	1000	220	24.5896	-110.404
07/09/2021	12:13	24.429	-110.392	Touristic panga	500	90	24.4289	-110.387
07/09/2021	12:24	24.4394	-110.399	Touristic panga	500	90	24.4394	-110.394
07/09/2021	12:26	24.4394	-110.399	Touristic panga	1000	120	24.4349	-110.391
07/09/2021	12:26	24.4394	-110.399	Touristic panga	1000	140	24.4325	-110.393
07/09/2021	12:44	24.4006	-110.376	Yacht	1000	270	24.4006	-110.386
07/09/2021	12:47	24.3927	-110.372	Sailing boat	200	90	24.3927	-110.37
07/09/2021	13:06	24.3736	-110.358	Sailing boat	50	270	24.3927	-110.37
07/09/2021	13:07	24.3736	-110.358	Yacht	100	180	24.3727	-110.358
07/09/2021	13:36	24.3597	-110.355	Touristic panga	2000	0	24.3777	-110.355
07/09/2021	13:56	24.3507	-110.372	Sailing boat	200	90	24.3507	-110.37
07/09/2021	14:04	24.3507	-110.372	Touristic panga	700	90	24.3507	-110.365
07/09/2021	14:24	24.2735	-110.345	Yacht	200	180	24.2717	-110.345
